# Supplementary material for: Improving PD-1 blockade plus chemotherapy for complete remission of lung cancer by nanoPDLIM2
Source: eLife journal article supplement (doi:10.7554/elife.89638), 2023-08-24
Supplement: fig1-data1 [file elife-89638-fig1-data1-v1.zip]

## Sheet: Fig1A
PDLIM2 RNA level (Log2 RSEM normalized)
NL	Tumor
3	1.095
2.718	-0.337
2.673	2.372
2.673	2.253
2.665	2.097
2.646	2.069
2.635	2.04
2.608	1.87
2.536	1.822
2.521	1.774
2.519	1.77
2.515	1.748
2.511	1.742
2.483	1.737
2.482	1.708
2.476	1.639
2.452	1.62
2.45	1.617
2.432	1.57
2.429	1.57
2.427	1.563
2.376	1.542
2.363	1.505
2.353	1.488
2.332	1.47
2.327	1.464
2.316	1.457
2.296	1.453
2.291	1.426
2.287	1.4
2.287	1.369
2.276	1.339
2.238	1.338
2.234	1.327
2.229	1.318
2.21	1.315
2.21	1.314
2.194	1.313
2.191	1.308
2.189	1.306
2.188	1.3
2.176	1.299
2.169	1.294
2.166	1.287
2.163	1.281
2.154	1.28
2.128	1.258
2.127	1.249
2.118	1.219
2.112	1.217
2.095	1.217
2.092	1.217
2.068	1.216
2.062	1.207
2.062	1.19
2.051	1.189
2.033	1.18
2.027	1.171
2.023	1.159
2.015	1.153
2.015	1.15
2.006	1.141
1.994	1.135
1.986	1.132
1.984	1.132
1.977	1.128
1.97	1.109
1.942	1.089
1.942	1.076
1.919	1.072
1.919	1.056
1.907	1.048
1.899	1.048
1.878	1.047
1.878	1.046
1.85	1.037
1.828	1.035
1.801	1.031
1.795	1.026
1.794	1.017
1.794	0.9901
1.785	0.99
1.781	0.9858
1.769	0.9821
1.767	0.9769
1.759	0.9741
1.74	0.9702
1.728	0.9685
1.723	0.9626
1.714	0.956
1.713	0.9553
1.697	0.9521
1.687	0.9519
1.681	0.9501
1.65	0.9495
1.649	0.9393
1.607	0.9388
1.55	0.9325
1.546	0.9325
1.541	0.9277
1.54	0.9257
1.503	0.9203
1.483	0.9088
1.475	0.9072
1.47	0.9009
1.463	0.9007
1.386	0.9001
1.365	0.9
1.289	0.8933
0.9662	0.8841
	0.8837
	0.8788
	0.8753
	0.8726
	0.8693
	0.8659
	0.8643
	0.8628
	0.8592
	0.8589
	0.8576
	0.8557
	0.8556
	0.8547
	0.8525
	0.8498
	0.8449
	0.8413
	0.8385
	0.8351
	0.8336
	0.8314
	0.8285
	0.8265
	0.8071
	0.8062
	0.8013
	0.8008
	0.7917
	0.7886
	0.7845
	0.7782
	0.778
	0.7754
	0.7747
	0.769
	0.7616
	0.7566
	0.7534
	0.7513
	0.7466
	0.7446
	0.7434
	0.7424
	0.741
	0.74
	0.7394
	0.7379
	0.7331
	0.7329
	0.7323
	0.7284
	0.7233
	0.713
	0.7123
	0.7108
	0.7102
	0.708
	0.7069
	0.7068
	0.7051
	0.7018
	0.7
	0.6997
	0.6982
	0.6939
	0.6892
	0.689
	0.6833
	0.6807
	0.6727
	0.6711
	0.666
	0.6632
	0.6607
	0.66
	0.6584
	0.6576
	0.6566
	0.656
	0.656
	0.6533
	0.6529
	0.6474
	0.6463
	0.6459
	0.6396
	0.6394
	0.6389
	0.6279
	0.627
	0.6227
	0.6225
	0.6214
	0.6163
	0.6087
	0.5969
	0.5961
	0.5957
	0.5927
	0.5903
	0.5749
	0.5745
	0.5743
	0.5741
	0.5735
	0.571
	0.5703
	0.5668
	0.5666
	0.5661
	0.566
	0.5647
	0.5642
	0.5602
	0.5601
	0.5597
	0.5585
	0.5584
	0.5571
	0.5568
	0.5524
	0.5523
	0.5504
	0.5494
	0.5486
	0.543
	0.5429
	0.5416
	0.541
	0.5409
	0.5407
	0.5406
	0.539
	0.538
	0.5371
	0.5304
	0.527
	0.5237
	0.5035
	0.5012
	0.4947
	0.4945
	0.4886
	0.4845
	0.4842
	0.4785
	0.4775
	0.4762
	0.476
	0.4759
	0.4742
	0.4733
	0.4719
	0.4717
	0.4716
	0.4699
	0.4697
	0.4697
	0.4684
	0.4638
	0.4625
	0.4577
	0.4519
	0.4515
	0.451
	0.4505
	0.4487
	0.447
	0.4436
	0.4391
	0.4391
	0.4379
	0.4379
	0.4339
	0.4326
	0.4314
	0.4274
	0.4268
	0.4264
	0.422
	0.4159
	0.4157
	0.4153
	0.4151
	0.4145
	0.4136
	0.4131
	0.4099
	0.4095
	0.4083
	0.4054
	0.4025
	0.4018
	0.4007
	0.399
	0.3983
	0.3978
	0.3969
	0.3969
	0.3967
	0.3926
	0.3925
	0.3922
	0.3919
	0.3785
	0.3767
	0.3764
	0.3737
	0.37
	0.3698
	0.3642
	0.364
	0.3602
	0.3595
	0.3573
	0.3563
	0.353
	0.3528
	0.3516
	0.3481
	0.3471
	0.347
	0.3442
	0.3414
	0.3402
	0.3383
	0.3351
	0.335
	0.3305
	0.3274
	0.3246
	0.3236
	0.3231
	0.3221
	0.3211
	0.3194
	0.3157
	0.3138
	0.312
	0.3061
	0.3052
	0.302
	0.3
	0.2995
	0.2882
	0.2839
	0.2826
	0.2812
	0.2807
	0.279
	0.2783
	0.2778
	0.2749
	0.2747
	0.2715
	0.2693
	0.2667
	0.2603
	0.254
	0.2536
	0.2518
	0.2477
	0.2445
	0.2424
	0.2413
	0.2401
	0.24
	0.2372
	0.2371
	0.2317
	0.2315
	0.2283
	0.2264
	0.2229
	0.2218
	0.2208
	0.2208
	0.2203
	0.2172
	0.2142
	0.213
	0.2125
	0.2105
	0.2077
	0.2077
	0.2052
	0.205
	0.2017
	0.2015
	0.2006
	0.2005
	0.1999
	0.1972
	0.1968
	0.1966
	0.1957
	0.1924
	0.1921
	0.1869
	0.1802
	0.1786
	0.1775
	0.1751
	0.1745
	0.174
	0.1734
	0.1722
	0.1721
	0.1715
	0.17
	0.1677
	0.1672
	0.1671
	0.1651
	0.1627
	0.1571
	0.1562
	0.1536
	0.1514
	0.15
	0.1482
	0.1475
	0.1465
	0.1425
	0.1378
	0.1371
	0.1348
	0.1336
	0.1332
	0.1328
	0.1267
	0.1195
	0.11
	0.1083
	0.1044
	0.1012
	0.1007
	0.09847
	0.09667
	0.09647
	0.07897
	0.07847
	0.07537
	0.07307
	0.06887
	0.06767
	0.06767
	0.06677
	0.05957
	0.05727
	0.05707
	0.05587
	0.05487
	0.05427
	0.05247
	0.05237
	0.05197
	0.05007
	0.04807
	0.04367
	0.04237
	0.04047
	0.04037
	0.04017
	0.03947
	0.03927
	0.03767
	0.03727
	0.03717
	0.03407
	0.03367
	0.03227
	0.03037
	0.02687
	0.01597
	0.01597
	0.01587
	0.01437
	0.01297
	0.01257
	0.005069
	0.002869
	0.002369
	-0.000431
	-0.002031
	-0.005331
	-0.005531
	-0.008131
	-0.008331
	-0.008731
	-0.009931
	-0.01033
	-0.01273
	-0.01873
	-0.02013
	-0.02133
	-0.02373
	-0.02563
	-0.02933
	-0.03143
	-0.03483
	-0.03553
	-0.03743
	-0.03803
	-0.03813
	-0.04203
	-0.04433
	-0.04843
	-0.05323
	-0.05323
	-0.05373
	-0.05703
	-0.05933
	-0.06113
	-0.06203
	-0.06473
	-0.06663
	-0.06683
	-0.06723
	-0.06983
	-0.07313
	-0.07353
	-0.07383
	-0.07443
	-0.07683
	-0.07853
	-0.08163
	-0.08323
	-0.08513
	-0.08543
	-0.08763
	-0.08823
	-0.08823
	-0.08933
	-0.09113
	-0.09273
	-0.09313
	-0.09503
	-0.09623
	-0.09903
	-0.09963
	-0.09973
	-0.1041
	-0.1065
	-0.1099
	-0.1114
	-0.1116
	-0.1118
	-0.1128
	-0.1142
	-0.1173
	-0.119
	-0.1198
	-0.1233
	-0.1268
	-0.1312
	-0.1324
	-0.1338
	-0.1356
	-0.1436
	-0.1436
	-0.1438
	-0.1487
	-0.1542
	-0.1564
	-0.1569
	-0.1578
	-0.16
	-0.1607
	-0.161
	-0.1622
	-0.1631
	-0.1634
	-0.1651
	-0.1663
	-0.1723
	-0.1762
	-0.1775
	-0.1783
	-0.1802
	-0.1822
	-0.1865
	-0.1894
	-0.1911
	-0.1939
	-0.1984
	-0.1998
	-0.2071
	-0.2072
	-0.2113
	-0.2117
	-0.214
	-0.2154
	-0.216
	-0.2164
	-0.2188
	-0.2198
	-0.2223
	-0.2256
	-0.23
	-0.2324
	-0.2338
	-0.2364
	-0.2382
	-0.2386
	-0.2435
	-0.2441
	-0.2448
	-0.2498
	-0.2537
	-0.2541
	-0.2567
	-0.2574
	-0.2582
	-0.259
	-0.2621
	-0.2627
	-0.2665
	-0.2665
	-0.2697
	-0.2711
	-0.2717
	-0.2721
	-0.2742
	-0.2759
	-0.2786
	-0.2788
	-0.279
	-0.2791
	-0.2804
	-0.2811
	-0.2885
	-0.291
	-0.2922
	-0.293
	-0.2936
	-0.2953
	-0.2956
	-0.3007
	-0.3033
	-0.3052
	-0.3075
	-0.3084
	-0.3131
	-0.3167
	-0.3212
	-0.3261
	-0.328
	-0.3287
	-0.3308
	-0.3311
	-0.332
	-0.333
	-0.3341
	-0.3348
	-0.3364
	-0.3371
	-0.3374
	-0.3379
	-0.3424
	-0.3435
	-0.3467
	-0.3469
	-0.357
	-0.3585
	-0.3596
	-0.3599
	-0.3637
	-0.3679
	-0.3684
	-0.3798
	-0.3807
	-0.3831
	-0.3848
	-0.3856
	-0.3883
	-0.4013
	-0.4016
	-0.4022
	-0.4028
	-0.4043
	-0.4062
	-0.4063
	-0.408
	-0.4082
	-0.4098
	-0.4101
	-0.4108
	-0.4139
	-0.415
	-0.4157
	-0.416
	-0.4169
	-0.4169
	-0.4197
	-0.4226
	-0.4277
	-0.4335
	-0.4382
	-0.4389
	-0.4398
	-0.4431
	-0.4462
	-0.4545
	-0.4571
	-0.4611
	-0.4618
	-0.4628
	-0.4643
	-0.4658
	-0.467
	-0.4695
	-0.4789
	-0.4789
	-0.4792
	-0.4797
	-0.4807
	-0.4842
	-0.4848
	-0.4862
	-0.4893
	-0.4924
	-0.4991
	-0.5021
	-0.5058
	-0.5078
	-0.5101
	-0.5149
	-0.5164
	-0.52
	-0.5226
	-0.5237
	-0.5258
	-0.5298
	-0.5314
	-0.5318
	-0.5333
	-0.5357
	-0.5382
	-0.5399
	-0.5426
	-0.545
	-0.5455
	-0.5481
	-0.5485
	-0.5532
	-0.5591
	-0.5628
	-0.5633
	-0.5661
	-0.5691
	-0.5716
	-0.5723
	-0.5735
	-0.5743
	-0.5786
	-0.5806
	-0.5848
	-0.586
	-0.5872
	-0.5899
	-0.5915
	-0.5935
	-0.594
	-0.5966
	-0.601
	-0.6033
	-0.6034
	-0.6091
	-0.612
	-0.618
	-0.6217
	-0.6258
	-0.6325
	-0.6326
	-0.6345
	-0.6365
	-0.6439
	-0.6473
	-0.6558
	-0.6569
	-0.6596
	-0.6614
	-0.6622
	-0.6716
	-0.6724
	-0.6728
	-0.6734
	-0.6774
	-0.679
	-0.6829
	-0.6844
	-0.6853
	-0.6855
	-0.6872
	-0.6952
	-0.6972
	-0.6973
	-0.7005
	-0.7022
	-0.7065
	-0.7065
	-0.7139
	-0.7194
	-0.7198
	-0.7202
	-0.7211
	-0.7212
	-0.7244
	-0.7304
	-0.7309
	-0.7321
	-0.7335
	-0.7385
	-0.7393
	-0.7482
	-0.7551
	-0.7571
	-0.7586
	-0.7606
	-0.7631
	-0.768
	-0.7702
	-0.7716
	-0.7733
	-0.7745
	-0.7755
	-0.7839
	-0.801
	-0.8016
	-0.8038
	-0.8074
	-0.8106
	-0.8109
	-0.8141
	-0.8144
	-0.8185
	-0.8202
	-0.8266
	-0.8278
	-0.8329
	-0.8363
	-0.8401
	-0.8513
	-0.8518
	-0.853
	-0.855
	-0.8596
	-0.864
	-0.8776
	-0.8876
	-0.8973
	-0.9018
	-0.9039
	-0.9044
	-0.9086
	-0.9096
	-0.9098
	-0.9101
	-0.911
	-0.9149
	-0.9189
	-0.9322
	-0.9382
	-0.9391
	-0.9454
	-0.9463
	-0.9499
	-0.9636
	-0.9703
	-0.9799
	-0.9844
	-0.993
	-1
	-1.002
	-1.003
	-1.009
	-1.016
	-1.027
	-1.028
	-1.035
	-1.041
	-1.041
	-1.051
	-1.054
	-1.057
	-1.078
	-1.084
	-1.085
	-1.085
	-1.086
	-1.088
	-1.09
	-1.097
	-1.1
	-1.104
	-1.106
	-1.128
	-1.131
	-1.136
	-1.136
	-1.137
	-1.139
	-1.149
	-1.153
	-1.156
	-1.164
	-1.164
	-1.17
	-1.171
	-1.176
	-1.196
	-1.21
	-1.23
	-1.232
	-1.25
	-1.258
	-1.26
	-1.271
	-1.277
	-1.285
	-1.29
	-1.294
	-1.302
	-1.309
	-1.319
	-1.32
	-1.321
	-1.341
	-1.342
	-1.343
	-1.348
	-1.353
	-1.356
	-1.357
	-1.36
	-1.365
	-1.372
	-1.372
	-1.392
	-1.407
	-1.417
	-1.419
	-1.422
	-1.426
	-1.429
	-1.433
	-1.459
	-1.463
	-1.464
	-1.485
	-1.496
	-1.507
	-1.514
	-1.516
	-1.52
	-1.524
	-1.525
	-1.531
	-1.543
	-1.544
	-1.546
	-1.556
	-1.576
	-1.588
	-1.617
	-1.618
	-1.624
	-1.631
	-1.632
	-1.637
	-1.642
	-1.646
	-1.648
	-1.655
	-1.666
	-1.677
	-1.682
	-1.719
	-1.728
	-1.739
	-1.746
	-1.746
	-1.758
	-1.77
	-1.796
	-1.842
	-1.861
	-1.861
	-1.925
	-1.937
	-1.944
	-1.957
	-1.96
	-1.972
	-2.013
	-2.025
	-2.046
	-2.132
	-2.313
	-2.399
	-2.422
	-2.469
	-2.511
	-2.664
	-2.7
	-3.18
	-3.693

## Sheet: Fig1B
Expression level	Methylation: Log10 (Beta value)
-3.693	-0.92482
-3.18	-1.03292
-2.7	-0.36421
-2.511	-0.58821
-2.469	-0.78781
-2.399	-1.0348
-2.313	-0.29397
-2.132	-0.87031
-2.046	-0.4583
-2.025	-0.81759
-2.013	-0.36845
-1.972	-0.99055
-1.96	-0.37069
-1.944	-0.27968
-1.925	-0.5862
-1.861	-0.9307
-1.861	-0.72285
-1.842	-0.36081
-1.796	-0.7263
-1.758	-0.48652
-1.746	-0.47237
-1.739	-0.72723
-1.728	-0.8671
-1.719	-0.98928
-1.682	-0.53566
-1.677	-0.58771
-1.666	-0.65876
-1.655	-0.58637
-1.648	-0.99097
-1.646	-0.40572
-1.642	-0.73212
-1.637	-0.42148
-1.632	-0.81702
-1.631	-0.99783
-1.624	-0.57365
-1.618	-0.545
-1.588	-0.85047
-1.576	-0.42724
-1.556	-0.42829
-1.546	-0.77314
-1.544	-0.85325
-1.531	-0.9539
-1.525	-0.57938
-1.52	-0.88907
-1.516	-0.88472
-1.514	-0.45002
-1.507	-0.54898
-1.496	-0.28853
-1.464	-0.33152
-1.463	-0.90413
-1.459	-1.04431
-1.433	-0.71829
-1.429	-0.7176
-1.426	-0.55799
-1.422	-0.56431
-1.419	-0.79183
-1.407	-0.27157
-1.392	-0.8468
-1.372	-1.08778
-1.372	-1.08619
-1.365	-0.73542
-1.36	-0.48625
-1.357	-0.52988
-1.356	-0.98005
-1.353	-0.66194
-1.348	-0.529
-1.343	-0.66675
-1.342	-0.99396
-1.341	-0.90309
-1.321	-1.02595
-1.32	-0.43593
-1.319	-0.35922
-1.302	-0.424
-1.294	-0.78042
-1.29	-0.68277
-1.285	-0.98464
-1.277	-1.00174
-1.271	-1.15304
-1.258	-0.78516
-1.232	-0.77911
-1.23	-0.93704
-1.21	-0.90939
-1.196	-0.65365
-1.176	-0.57414
-1.171	-1.07314
-1.17	-0.4209
-1.164	-1.00789
-1.164	-0.66514
-1.156	-0.727
-1.153	-0.47198
-1.139	-0.55988
-1.136	-1.04721
-1.136	-0.98632
-1.131	-0.60485
-1.128	-0.99697
-1.1	-0.84224
-1.09	-0.4133
-1.088	-0.65267
-1.086	-0.98716
-1.085	-0.74618
-1.085	-0.39816
-1.084	-0.46623
-1.078	-0.53003
-1.057	-0.46712
-1.054	-0.9914
-1.041	-0.7176
-1.035	-0.98005
-1.028	-0.82333
-1.027	-0.70443
-1.016	-1.04528
-1.003	-0.80327
-1.002	-0.73945
-1	-1.01189
-0.993	-0.76045
-0.9844	-0.58637
-0.9799	-0.50529
-0.9703	-1.00261
-0.9636	-0.53195
-0.9499	-0.90728
-0.9463	-0.83565
-0.9454	-1.00174
-0.9391	-1.22548
-0.9382	-1.07314
-0.9189	-0.84802
-0.9149	-1.29414
-0.911	-0.94692
-0.9101	-1.02641
-0.9086	-1.13847
-0.9039	-1.007
-0.9018	-0.59654
-0.8973	-0.4973
-0.8876	-1.02595
-0.8776	-0.89688
-0.864	-0.95429
-0.8596	-1.28067
-0.855	-0.75326
-0.853	-0.52974
-0.8518	-1.02273
-0.8513	-0.61852
-0.8401	-0.75154
-0.8363	-0.46737
-0.8329	-0.74376
-0.8278	-0.75721
-0.8266	-0.9594
-0.8202	-0.75473
-0.8185	-0.9307
-0.8144	-0.98674
-0.8141	-0.95703
-0.8109	-0.91009
-0.8106	-0.56368
-0.8074	-1.04576
-0.8038	-0.96417
-0.8016	-0.66294
-0.801	-0.45506
-0.7839	-0.6247
-0.7755	-1.01457
-0.7745	-0.60924
-0.7733	-0.94233
-0.7716	-0.46458
-0.7702	-1.0048
-0.768	-0.94157
-0.7631	-0.95664
-0.7606	-0.59843
-0.7586	-0.90205
-0.7571	-0.98928
-0.7551	-0.694
-0.7482	-0.43392
-0.7393	-0.9974
-0.7385	-1.04431
-0.7321	-0.97964
-0.7244	-0.95234
-0.7212	-0.96059
-0.7198	-0.87484
-0.7139	-0.83983
-0.7065	-0.78835
-0.7022	-0.96537
-0.7005	-0.54348
-0.6973	-0.99957
-0.6972	-1.11805
-0.6855	-0.32975
-0.6844	-1.0048
-0.6829	-0.90658
-0.679	-0.8471
-0.6774	-0.70246
-0.6734	-0.67182
-0.6728	-1.01818
-0.6724	-1.06198
-0.6716	-1.14813
-0.6622	-0.94615
-0.6614	-0.60765
-0.6596	-1.14691
-0.6558	-0.90136
-0.6473	-0.97881
-0.6439	-1.18509
-0.6365	-1.02503
-0.6345	-0.90588
-0.6325	-0.38955
-0.6258	-0.94271
-0.6217	-1.02091
-0.612	-0.96778
-0.6091	-1.1343
-0.6034	-0.553
-0.6033	-0.91293
-0.5966	-0.7612
-0.594	-0.44709
-0.5935	-0.61048
-0.5915	-0.97881
-0.5899	-0.99568
-0.5872	-0.75746
-0.586	-1.02872
-0.5848	-0.14942
-0.5806	-0.81446
-0.5786	-1.00174
-0.5743	-0.87031
-0.5723	-1.02733
-0.5716	-0.91937
-0.5691	-0.78995
-0.5661	-1.04239
-0.5628	-0.63041
-0.5591	-0.80521
-0.5532	-0.56992
-0.5485	-0.7592
-0.5481	-0.93592
-0.5455	-1.011
-0.545	-1.03763
-0.5426	-0.81389
-0.5399	-0.26217
-0.5382	-1.00218
-0.5357	-0.43321
-0.5333	-0.96059
-0.5318	-0.70465
-0.5258	-0.76981
-0.5237	-0.9859
-0.5226	-0.91757
-0.52	-0.79997
-0.5164	-0.92555
-0.5149	-0.97964
-0.5101	-0.68613
-0.5078	-1.09963
-0.5021	-0.93517
-0.4893	-0.86296
-0.4862	-0.89415
-0.4848	-0.81616
-0.4792	-0.74136
-0.4789	-0.83565
-0.4695	-1.0348
-0.467	-0.37458
-0.4658	-1.09366
-0.4643	-1.16178
-0.4628	-0.39621
-0.4618	-0.83327
-0.4611	-1.07935
-0.4571	-1.24872
-0.4462	-0.82275
-0.4431	-0.73636
-0.4398	-0.47782
-0.4389	-0.87844
-0.4382	-0.51046
-0.4335	-1.08355
-0.4277	-0.97922
-0.4226	-1.06956
-0.4197	-0.79022
-0.4169	-0.95234
-0.4169	-0.69037
-0.416	-0.90413
-0.4157	-0.84619
-0.415	-0.84802
-0.4139	-0.97347
-0.4101	-0.58553
-0.4098	-0.66716
-0.408	-0.97428
-0.4062	-0.93742
-0.4043	-0.99697
-0.4028	-1.13906
-0.4022	-0.55269
-0.4016	-0.54622
-0.4013	-0.96257
-0.3883	-0.9535
-0.3856	-0.97716
-0.3848	-0.99268
-0.3831	-0.69272
-0.3807	-0.94846
-0.3684	-1.27819
-0.3679	-0.93107
-0.3637	-0.71625
-0.3596	-0.67819
-0.3469	-0.8471
-0.3467	-1.09583
-0.3435	-0.89245
-0.3424	-0.74328
-0.3379	-1.16494
-0.3374	-0.96981
-0.3371	-0.50031
-0.337	-0.81844
-0.3364	-0.63209
-0.3348	-1.01189
-0.333	-0.94348
-0.332	-1.06298
-0.3311	-0.9813
-0.3308	-0.99097
-0.328	-0.87713
-0.3212	-0.62397
-0.3167	-0.49894
-0.3075	-0.69508
-0.3052	-1.16813
-0.3033	-1.02136
-0.3007	-1.19997
-0.2956	-0.99697
-0.2953	-0.97143
-0.2936	-0.82304
-0.293	-0.76472
-0.2922	-1.00833
-0.291	-0.68298
-0.2885	-0.95624
-0.2811	-0.74041
-0.2804	-0.94119
-0.2791	-0.86012
-0.279	-0.87517
-0.2788	-1.10846
-0.2786	-1.10846
-0.2759	-0.92996
-0.2742	-0.90798
-0.2721	-0.43498
-0.2711	-0.62489
-0.2697	-1.0846
-0.2665	-0.98928
-0.2665	-0.73236
-0.2627	-0.99311
-0.2621	-0.50738
-0.259	-0.95861
-0.2567	-0.49526
-0.2541	-0.99311
-0.2537	-1.15989
-0.2441	-0.28266
-0.2435	-1.21896
-0.2386	-1.00524
-0.2382	-0.5496
-0.2338	-0.91257
-0.2324	-0.85263
-0.23	-0.75647
-0.2256	-1.01011
-0.2223	-0.35863
-0.2198	-0.93667
-0.2164	-0.61208
-0.216	-1.06198
-0.2154	-0.92628
-0.214	-0.94885
-0.2117	-0.97347
-0.2113	-1.07417
-0.2072	-0.8687
-0.2071	-1.16368
-0.1998	-1.18442
-0.1984	-0.87844
-0.1939	-0.94233
-0.1911	-0.88273
-0.1894	-1.057
-0.1865	-0.92592
-0.1822	-1.00656
-0.1802	-1.03953
-0.1775	-1.19791
-0.1762	-0.9974
-0.1634	-0.71942
-0.1631	-0.91116
-0.1607	-0.92665
-0.1578	-0.87257
-0.1569	-0.95078
-0.1542	-0.90448
-0.1487	-0.58553
-0.1438	-0.9017
-0.1436	-1.02045
-0.1436	-0.8755
-0.1338	-0.74812
-0.1324	-0.85201
-0.1312	-0.97964
-0.1233	-0.95507
-0.1198	-0.55517
-0.119	-0.88975
-0.1173	-1.04672
-0.1128	-1.05651
-0.1118	-1.08302
-0.1116	-0.4443
-0.1114	-1.14813
-0.1099	-0.87031
-0.1065	-0.82507
-0.1041	-0.81417
-0.09963	-1.18642
-0.09623	-1.00966
-0.09503	-0.87063
-0.09273	-0.94119
-0.09113	-1.02457
-0.08933	-0.94846
-0.08823	-0.73874
-0.08763	-0.89928
-0.08543	-0.91116
-0.08323	-1.06753
-0.08163	-1.00218
-0.07853	-0.33311
-0.07443	-0.94348
-0.06683	-0.80771
-0.06663	-1.02826
-0.06473	-0.27019
-0.06203	-1.0013
-0.06113	-0.93293
-0.05933	-0.94195
-0.05703	-0.92118
-0.05373	-0.68677
-0.05323	-1.07366
-0.05323	-0.97469
-0.04843	-0.91045
-0.04433	-1.04528
-0.03813	-0.86296
-0.03803	-0.84224
-0.03743	-0.36341
-0.03553	-0.68571
-0.03483	-0.90483
-0.03143	-0.47083
-0.02933	-0.87778
-0.02563	-0.9333
-0.02373	-1.01368
-0.02133	-0.96218
-0.02013	-0.92702
-0.01873	-0.73802
-0.01273	-0.95078
-0.01033	-0.97184
-0.009931	-1.03245
-0.008731	-1.08092
-0.008331	-0.43321
-0.008131	-0.96257
-0.005531	-1.06248
-0.005331	-0.99439
-0.002031	-1.1296
-0.000431	-0.51499
0.002369	-1.03433
0.002869	-1.01189
0.005069	-1.02919
0.01257	-1.01144
0.01297	-0.41612
0.01437	-0.99783
0.01587	-0.97062
0.01597	-0.83773
0.01597	-0.37335
0.03037	-0.94731
0.03407	-0.65384
0.03717	-0.91471
0.03767	-1.00612
0.03927	-0.87128
0.04017	-0.8318
0.04037	-0.74376
0.04047	-0.95782
0.04237	-0.656
0.04367	-0.8122
0.04807	-1.0048
0.05007	-1.1152
0.05197	-1.0013
0.05237	-0.76981
0.05247	-0.60415
0.05427	-0.91973
0.05487	-1.05651
0.05587	-0.98088
0.05707	-0.98047
0.05727	-1.10403
0.05957	-1.00436
0.06767	-1.09854
0.06887	-0.74739
0.07307	-0.97922
0.07537	-0.96617
0.07847	-1.09205
0.07897	-1.11976
0.09667	-0.62415
0.09847	-0.92812
0.1012	-1.0752
0.1083	-0.98088
0.11	-0.40638
0.1195	-0.57873
0.1267	-1.00305
0.1332	-0.53835
0.1336	-0.90833
0.1348	-0.97428
0.1371	-1.10791
0.1378	-0.52739
0.1465	-1.02228
0.1475	-0.98801
0.1482	-1.05849
0.15	-0.89585
0.1536	-0.95782
0.1562	-1.00349
0.1627	-0.93256
0.1671	-0.76574
0.1672	-0.8884
0.1677	-0.94157
0.1715	-0.42125
0.1721	-1.14509
0.1734	-0.97922
0.174	-1.08778
0.1745	-0.91614
0.1751	-0.66797
0.1786	-1.04144
0.1802	-1.28904
0.1921	-1.12552
0.1966	-0.81588
0.1968	-0.85792
0.1972	-1.3439
0.1999	-1.20621
0.2005	-1.00877
0.2006	-1.05651
0.2015	-0.83003
0.2017	-0.88907
0.2052	-1.10624
0.2077	-1.09854
0.2105	-0.37623
0.2125	-0.86774
0.213	-1.06854
0.2142	-1.11748
0.2203	-1.13194
0.2208	-1.04818
0.2208	-0.88074
0.2218	-0.93892
0.2229	-0.9897
0.2264	-0.99055
0.2317	-0.90413
0.2371	-0.92445
0.2372	-0.97306
0.24	-1.07676
0.2413	-1.00966
0.2445	-1.04672
0.254	-0.95703
0.2603	-0.86075
0.2667	-1.03953
0.2747	-0.93817
0.2749	-1.04431
0.2783	-1.11976
0.279	-0.80576
0.2807	-1.05948
0.2812	-0.98758
0.2839	-1.10237
0.2995	-0.95273
0.3	-0.95821
0.302	-1.11238
0.3052	-0.63827
0.3061	-0.99268
0.312	-0.95039
0.3138	-1.0575
0.3157	-1.2233
0.3194	-0.89688
0.3211	-0.94769
0.3221	-0.76195
0.3231	-0.58653
0.3236	-1.01323
0.3246	-1.00087
0.3305	-1.19791
0.335	-0.93704
0.3351	-0.95429
0.3383	-0.59739
0.3402	-1.05601
0.3442	-0.9813
0.347	-0.98338
0.3471	-0.72677
0.3481	-1.02319
0.3516	-1.25571
0.353	-0.94271
0.3563	-1.25493
0.3573	-1.04239
0.3602	-1.05552
0.364	-0.87877
0.3642	-1.1831
0.37	-1.12205
0.3764	-0.80743
0.3767	-0.96337
0.3785	-0.94044
0.3919	-1.01457
0.3922	-0.93517
0.3925	-0.62507
0.3926	-1.00568
0.3967	-1.007
0.3969	-0.97757
0.3969	-0.73049
0.3978	-0.99827
0.3983	-0.7967
0.399	-0.94348
0.4007	-0.80827
0.4018	-0.7469
0.4025	-0.97881
0.4054	-1.0716
0.4083	-1.07779
0.4095	-0.89008
0.4131	-1.00087
0.4145	-0.89928
0.4157	-1.0013
0.4159	-0.87419
0.422	-1.02228
0.4268	-0.93742
0.4274	-1.02457
0.4314	-0.98843
0.4326	-0.56146
0.4339	-0.96577
0.4391	-1.00877
0.447	-0.65639
0.4487	-0.76574
0.451	-0.77288
0.4515	-0.86391
0.4638	-0.79615
0.4684	-0.75671
0.4697	-0.9307
0.4697	-0.91721
0.4699	-1.10568
0.4717	-0.63432
0.4719	-0.9813
0.4733	-0.8884
0.4742	-0.96257
0.4759	-1.0804
0.476	-0.98843
0.4762	-1.00966
0.4785	-0.9974
0.4842	-0.99097
0.4886	-0.75105
0.4945	-0.98464
0.5012	-0.90448
0.5035	-0.88739
0.5237	-0.88941
0.527	-1.03433
0.5304	-0.98047
0.5371	-0.90658
0.538	-0.82016
0.539	-1.15927
0.5406	-0.89483
0.5407	-0.92191
0.5416	-1.057
0.543	-0.95273
0.5486	-1.26841
0.5494	-1.26201
0.5504	-0.97102
0.5523	-0.55129
0.5524	-0.98674
0.5568	-0.96859
0.5571	-0.9914
0.5584	-0.92849
0.5585	-1.007
0.5597	-0.94539
0.5601	-0.76321
0.5602	-0.92885
0.5642	-1.03058
0.5661	-1.00966
0.5666	-1.09528
0.5668	-0.95001
0.5703	-0.54546
0.571	-0.3709
0.5735	-0.85981
0.5741	-0.59739
0.5743	-1.00877
0.5745	-1.01368
0.5749	-0.7597
0.5903	-0.90136
0.5927	-0.65699
0.5957	-0.88807
0.5961	-0.60293
0.5969	-0.97428
0.6087	-0.91829
0.6163	-0.553
0.6214	-1.02965
0.6227	-0.87976
0.627	-0.95156
0.6279	-1.03339
0.6389	-0.90588
0.6396	-1.03716
0.6459	-1.00174
0.6463	-0.74065
0.6474	-1.18642
0.6529	-1.04915
0.6533	-0.99268
0.656	-1.03058
0.656	-0.9017
0.6566	-1.05208
0.6576	-1.01368
0.66	-1.31158
0.6607	-1.08197
0.666	-1.04576
0.6711	-0.77392
0.6727	-1.04096
0.6807	-1.14813
0.6833	-0.94731
0.689	-0.79075
0.6892	-0.97922
0.6939	-0.99697
0.6997	-0.81361
0.7	-0.77057
0.7018	-1.47496
0.7051	-0.76321
0.7068	-0.92628
0.7069	-0.85792
0.708	-0.89551
0.7102	-0.80521
0.7108	-0.9897
0.7123	-0.80189
0.713	-0.92738
0.7233	-0.87778
0.7284	-0.93855
0.7323	-1.02687
0.7329	-0.85109
0.7379	-1.20831
0.7394	-1.12494
0.74	-1.00349
0.741	-0.92922
0.7424	-1.03763
0.7434	-0.9017
0.7446	-1.06198
0.7466	-1.01457
0.7513	-0.80189
0.7534	-1.25649
0.7566	-0.98801
0.7616	-1.12726
0.769	-0.89347
0.7747	-0.65443
0.7754	-0.97675
0.778	-1.01818
0.7845	-1.09259
0.8013	-0.99439
0.8062	-1.01368
0.8071	-1.08672
0.8265	-0.94731
0.8285	-1.03858
0.8314	-0.9838
0.8336	-0.914
0.8385	-1.07314
0.8413	-0.97469
0.8498	-1.01863
0.8525	-0.9914
0.8547	-1.00087
0.8556	-0.9987
0.8557	-0.94577
0.8576	-0.60713
0.8589	-1.03198
0.8592	-1.00789
0.8628	-1.04915
0.8643	-0.99482
0.8659	-0.94195
0.8726	-0.96778
0.8837	-0.62986
0.8841	-1.02045
0.8933	-1.16368
0.9	-0.9784
0.9001	-1.05061
0.9007	-1.0013
0.9009	-1.05306
0.9072	-0.99055
0.9088	-0.93479
0.9203	-0.98928
0.9257	-0.94271
0.9277	-1.23508
0.9325	-1.05208
0.9325	-0.79724
0.9393	-0.88639
0.9495	-0.90032
0.9501	-0.95546
0.9519	-0.89585
0.9521	-0.59278
0.9553	-1.02549
0.956	-1.13966
0.9626	-0.81474
0.9685	-0.97224
0.9702	-0.80939
0.9741	-0.94808
0.9769	-0.734
0.9901	-1.02826
1.026	-0.92628
1.031	-0.99568
1.035	-0.9201
1.037	-0.88907
1.046	-0.92628
1.047	-0.94885
1.048	-0.95039
1.048	-0.92702
1.056	-1.05159
1.072	-1.11238
1.076	-1.00966
1.089	-1.03152
1.095	-0.94386
1.109	-0.95979
1.128	-0.94923
1.132	-0.98213
1.132	-0.97062
1.15	-1.13787
1.153	-0.86934
1.159	-0.9987
1.171	-1.10182
1.18	-1.03905
1.19	-1.27491
1.207	-0.88506
1.216	-0.88739
1.217	-0.91116
1.217	-0.87257
1.219	-1.39362
1.249	-0.99353
1.258	-1.16558
1.28	-0.99957
1.281	-1.06298
1.287	-1.05257
1.294	-0.91686
1.299	-0.97143
1.3	-0.95234
1.306	-0.923
1.315	-1.2204
1.318	-0.92336
1.327	-1.13847
1.338	-0.98674
1.339	-1.05306
1.369	-0.70049
1.4	-0.79317
1.426	-0.9694
1.453	-1.17522
1.464	-0.8514
1.47	-1.0013
1.488	-0.89313
1.542	-0.94731
1.563	-1.12033
1.57	-1.16178
1.57	-1.11634
1.617	-0.93517
1.62	-1.16558
1.639	-0.9987
1.708	-1.0348
1.737	-0.91364
1.742	-1.10403
1.77	-1.02045
1.774	-1.08778
1.822	-1.07314
2.253	-1.09637
2.372	-1.07058

## Sheet: Fig1C
Expression level	Copy number variation (Gistic2)
-3.693	-1.293
-3.18	-0.953
-2.7	-0.75
-2.664	-0.742
-2.511	0.015
-2.469	-0.665
-2.422	0.016
-2.399	0.057
-2.313	-0.544
-2.132	-0.959
-2.046	-0.728
-2.025	-0.356
-2.013	-0.824
-1.972	-0.037
-1.96	-0.691
-1.957	-0.914
-1.944	-0.899
-1.937	-0.488
-1.925	-0.573
-1.861	-0.331
-1.861	-0.482
-1.842	-0.191
-1.796	-0.668
-1.77	-0.511
-1.758	-0.646
-1.746	-0.381
-1.746	-0.888
-1.739	-0.665
-1.728	-0.504
-1.719	-0.312
-1.682	-0.454
-1.677	-0.574
-1.666	-0.345
-1.655	-0.342
-1.648	-0.504
-1.646	-0.591
-1.642	0.036
-1.637	-0.015
-1.632	-0.925
-1.631	-0.558
-1.624	-0.031
-1.618	-0.799
-1.617	-0.582
-1.588	-0.819
-1.576	-0.289
-1.556	0.175
-1.546	-0.483
-1.544	-0.02
-1.543	-0.687
-1.531	-0.646
-1.525	-0.504
-1.524	-0.448
-1.52	-0.326
-1.516	-0.795
-1.514	-0.578
-1.507	-0.436
-1.496	-0.03
-1.485	-0.007
-1.464	-0.266
-1.463	-0.641
-1.459	-0.419
-1.433	-0.77
-1.429	-0.31
-1.426	-0.395
-1.422	-0.39
-1.419	-0.268
-1.417	-0.52
-1.407	0.005
-1.392	-0.793
-1.372	-0.013
-1.372	-0.373
-1.365	-0.34
-1.36	-0.505
-1.357	0.036
-1.356	-0.959
-1.353	-0.678
-1.348	-0.87
-1.343	0.288
-1.342	-0.461
-1.341	-0.023
-1.321	-0.737
-1.32	0.002
-1.319	0.016
-1.309	-1.102
-1.302	-0.66
-1.294	-0.522
-1.29	-0.504
-1.285	-0.923
-1.277	-0.834
-1.271	-0.867
-1.26	-0.515
-1.258	-0.67
-1.25	-0.383
-1.232	0.01
-1.23	-0.59
-1.21	-0.586
-1.196	-0.536
-1.176	-0.524
-1.171	-0.9
-1.17	-0.412
-1.164	0.094
-1.164	-0.491
-1.156	-0.532
-1.153	-0.699
-1.149	-0.598
-1.139	-0.503
-1.137	-0.014
-1.136	-0.746
-1.136	-0.975
-1.131	-0.023
-1.128	-0.733
-1.106	-1.047
-1.104	-0.117
-1.1	-0.379
-1.097	-0.077
-1.09	-0.795
-1.088	-0.544
-1.086	-0.557
-1.085	-0.145
-1.085	-0.279
-1.084	0.246
-1.078	-0.528
-1.057	-0.058
-1.054	0.394
-1.051	0.401
-1.041	-0.286
-1.041	-0.316
-1.035	-0.854
-1.028	-0.112
-1.027	-0.651
-1.016	0.821
-1.009	-1.268
-1.003	-0.607
-1.002	-0.594
-1	-0.495
-0.993	-0.839
-0.9844	-0.744
-0.9799	-0.537
-0.9703	0.422
-0.9636	-0.276
-0.9499	-0.435
-0.9463	0.001
-0.9454	-0.702
-0.9391	-0.121
-0.9382	-0.643
-0.9322	0.001
-0.9189	0.017
-0.9149	-0.567
-0.911	-0.428
-0.9101	-0.414
-0.9098	0.065
-0.9096	-0.548
-0.9086	-0.526
-0.9044	-0.947
-0.9039	-0.441
-0.9018	-0.569
-0.8973	-0.086
-0.8876	-1.014
-0.8776	-0.272
-0.864	-0.419
-0.8596	-0.094
-0.855	-0.409
-0.853	-0.044
-0.8518	-0.495
-0.8513	-0.015
-0.8401	-0.107
-0.8363	0.393
-0.8329	-0.355
-0.8278	-0.236
-0.8266	-0.374
-0.8202	0.314
-0.8185	-0.761
-0.8144	0.141
-0.8141	-0.23
-0.8109	0.298
-0.8106	-0.757
-0.8074	-0.645
-0.8038	0.405
-0.8016	-0.417
-0.801	-0.037
-0.7839	-0.611
-0.7755	-0.337
-0.7745	-0.969
-0.7733	-0.049
-0.7716	-0.239
-0.7702	-0.047
-0.768	-0.715
-0.7631	-0.059
-0.7606	-0.428
-0.7586	0.025
-0.7571	-0.654
-0.7551	-0.658
-0.7482	-0.531
-0.7393	-0.41
-0.7385	0.003
-0.7335	-0.425
-0.7321	-0.909
-0.7309	-0.575
-0.7304	-0.382
-0.7244	0.331
-0.7212	-0.33
-0.7211	-0.903
-0.7202	-0.755
-0.7198	-0.288
-0.7194	-0.245
-0.7139	-0.074
-0.7065	-0.599
-0.7065	-0.948
-0.7022	-0.537
-0.7005	-0.696
-0.6973	-1.172
-0.6972	-0.564
-0.6952	-0.578
-0.6872	-0.684
-0.6855	-0.001
-0.6853	-0.45
-0.6844	-1.273
-0.6829	0.307
-0.679	-0.046
-0.6774	-0.398
-0.6734	-0.452
-0.6728	0.168
-0.6724	-0.56
-0.6716	-0.399
-0.6622	-0.485
-0.6614	-0.403
-0.6596	-0.198
-0.6569	-0.356
-0.6558	-0.451
-0.6473	0.252
-0.6439	-0.596
-0.6365	-0.34
-0.6345	-0.538
-0.6326	-0.58
-0.6325	0.217
-0.6258	-0.522
-0.6217	0
-0.618	-0.76
-0.612	-0.062
-0.6091	0.109
-0.6034	-0.52
-0.6033	-0.571
-0.601	-0.487
-0.5966	-0.415
-0.594	-0.336
-0.5935	-0.328
-0.5915	0.115
-0.5899	0
-0.5872	-0.442
-0.586	0.177
-0.5848	-0.457
-0.5806	-0.316
-0.5786	-0.351
-0.5743	-0.356
-0.5735	-0.324
-0.5723	-0.596
-0.5716	-0.2
-0.5691	-0.748
-0.5661	-0.315
-0.5633	-0.385
-0.5628	-0.319
-0.5591	-0.439
-0.5532	0.539
-0.5485	-0.343
-0.5481	-0.9
-0.5455	-0.798
-0.545	-0.202
-0.5426	-0.864
-0.5399	-0.313
-0.5382	-0.292
-0.5357	0.039
-0.5333	-0.59
-0.5318	-0.501
-0.5314	0.526
-0.5298	-0.618
-0.5258	-0.193
-0.5237	-0.465
-0.5226	-0.594
-0.52	-0.464
-0.5164	0.054
-0.5149	-0.709
-0.5101	0.885
-0.5078	-0.851
-0.5058	-0.112
-0.5021	-0.354
-0.4991	-0.487
-0.4924	-0.728
-0.4893	-0.355
-0.4862	-0.774
-0.4848	-0.196
-0.4842	-0.123
-0.4807	0.226
-0.4797	-0.422
-0.4792	-0.564
-0.4789	-0.029
-0.4789	-0.034
-0.4695	-0.853
-0.467	0.047
-0.4658	-0.528
-0.4643	-0.829
-0.4628	-0.382
-0.4618	-0.371
-0.4611	-0.216
-0.4571	0.022
-0.4545	-0.104
-0.4462	-0.482
-0.4431	-0.155
-0.4398	-0.527
-0.4382	-0.366
-0.4335	-0.589
-0.4277	-0.778
-0.4226	-0.354
-0.4197	-0.569
-0.4169	0.068
-0.4169	0
-0.416	-0.001
-0.4157	-0.281
-0.415	-0.337
-0.4139	0.211
-0.4108	-0.004
-0.4101	-0.703
-0.4098	0.568
-0.4082	-0.637
-0.408	-0.051
-0.4063	-0.351
-0.4062	-0.738
-0.4043	0.012
-0.4028	-0.94
-0.4022	0.011
-0.4016	0.229
-0.4013	-0.001
-0.3883	-0.598
-0.3856	-0.533
-0.3848	-0.803
-0.3831	-0.19
-0.3807	0.003
-0.3798	-0.498
-0.3684	-0.334
-0.3679	0.191
-0.3637	-0.612
-0.3599	-0.63
-0.3596	-0.384
-0.3585	-0.463
-0.357	-0.258
-0.3469	-0.667
-0.3467	-0.922
-0.3435	-0.476
-0.3424	-0.159
-0.3379	-0.329
-0.3374	-0.532
-0.3371	0.044
-0.3364	-0.162
-0.3348	-0.403
-0.3341	-0.194
-0.333	-0.514
-0.332	0.021
-0.3311	0.068
-0.3308	-0.112
-0.3287	-0.334
-0.328	0.11
-0.3261	-0.407
-0.3212	-0.563
-0.3167	-0.02
-0.3131	-0.336
-0.3084	-0.09
-0.3075	-0.424
-0.3052	0.031
-0.3033	-0.53
-0.3007	-0.58
-0.2956	-0.31
-0.2953	0.026
-0.2936	-0.367
-0.293	-0.036
-0.2922	-0.052
-0.291	-0.238
-0.2885	0.022
-0.2811	-0.474
-0.2804	-0.367
-0.2791	-0.176
-0.279	0.002
-0.2788	-0.621
-0.2786	-0.079
-0.2759	0.006
-0.2742	0.18
-0.2721	-0.762
-0.2717	-0.624
-0.2711	-0.253
-0.2697	-0.673
-0.2665	-0.01
-0.2665	-0.387
-0.2627	-0.383
-0.2621	0.018
-0.259	-0.345
-0.2582	0.505
-0.2574	-0.648
-0.2567	-0.899
-0.2541	-0.708
-0.2537	-0.576
-0.2498	0.183
-0.2448	0.079
-0.2441	-0.433
-0.2435	0.004
-0.2386	-0.001
-0.2382	-0.715
-0.2364	0.093
-0.2338	-0.087
-0.2324	-0.492
-0.23	-0.471
-0.2256	-0.165
-0.2223	-0.088
-0.2198	-0.343
-0.2188	-0.401
-0.2164	-0.237
-0.216	0.422
-0.2154	-0.709
-0.214	-0.018
-0.2117	-0.554
-0.2113	-0.408
-0.2072	-0.234
-0.2071	-0.032
-0.1998	-0.478
-0.1984	-0.551
-0.1939	-0.069
-0.1911	0.396
-0.1894	-0.27
-0.1865	-0.025
-0.1822	-0.118
-0.1802	-0.421
-0.1783	-0.479
-0.1775	-0.273
-0.1762	0
-0.1723	-0.453
-0.1663	-0.529
-0.1651	-0.456
-0.1634	-0.026
-0.1631	-0.561
-0.1622	-0.452
-0.161	-0.486
-0.1607	-0.295
-0.16	-0.394
-0.1578	-0.077
-0.1569	-0.316
-0.1564	-1.006
-0.1542	0.004
-0.1487	0.06
-0.1438	0.404
-0.1436	0.026
-0.1436	0.005
-0.1356	-0.484
-0.1338	-0.156
-0.1324	-0.193
-0.1312	-0.525
-0.1268	-0.663
-0.1233	-0.138
-0.1198	0.209
-0.119	-0.418
-0.1173	-0.267
-0.1142	-0.457
-0.1128	-0.35
-0.1118	-0.483
-0.1116	-0.436
-0.1114	-0.211
-0.1099	-1.05
-0.1065	0.203
-0.1041	-0.226
-0.09973	-0.545
-0.09963	0
-0.09903	-0.446
-0.09623	0.041
-0.09503	-0.691
-0.09313	-0.543
-0.09273	-0.576
-0.09113	-0.336
-0.08933	-0.139
-0.08823	0.001
-0.08823	-0.025
-0.08763	-0.39
-0.08543	-0.362
-0.08513	-0.255
-0.08323	-0.479
-0.08163	-0.751
-0.07853	-0.532
-0.07683	0.206
-0.07443	-0.117
-0.07383	0.335
-0.07353	-0.218
-0.07313	-0.033
-0.06983	0.316
-0.06723	-0.137
-0.06683	-0.48
-0.06663	-0.527
-0.06473	-0.231
-0.06203	-0.346
-0.06113	0.131
-0.05933	-0.462
-0.05703	-0.632
-0.05373	0.346
-0.05323	0.255
-0.05323	-0.594
-0.04843	-0.021
-0.04433	-0.204
-0.04203	-0.462
-0.03813	0.265
-0.03803	-0.444
-0.03743	0.323
-0.03553	0.436
-0.03483	-0.682
-0.03143	-0.628
-0.02933	-0.491
-0.02563	-0.328
-0.02373	-0.506
-0.02133	-0.196
-0.02013	-0.145
-0.01873	-0.552
-0.01273	0.006
-0.01033	-0.343
-0.009931	-0.449
-0.008731	-0.483
-0.008331	-0.307
-0.008131	0.206
-0.005531	-0.385
-0.005331	-0.443
-0.002031	-0.383
-0.000431	-0.323
0.002369	-0.369
0.002869	0.45
0.005069	0
0.01257	-0.572
0.01297	0.048
0.01437	-0.389
0.01587	-0.717
0.01597	0.23
0.01597	-0.318
0.02687	-0.22
0.03037	-0.613
0.03227	-0.31
0.03367	-0.248
0.03717	-0.157
0.03727	-0.37
0.03767	-0.632
0.03927	-0.331
0.03947	-0.35
0.04017	0
0.04037	0.007
0.04047	0.274
0.04237	-0.629
0.04367	-0.076
0.04807	-0.195
0.05007	-0.204
0.05197	-0.659
0.05237	-0.198
0.05247	0.024
0.05427	0.149
0.05487	-0.348
0.05587	-0.478
0.05707	-0.234
0.05727	-0.259
0.05957	-0.269
0.06677	-0.378
0.06767	0.007
0.06767	-0.17
0.06887	0.043
0.07307	-0.031
0.07537	-0.237
0.07847	-0.246
0.07897	-0.412
0.09647	-0.636
0.09667	0
0.09847	-0.266
0.1007	0.188
0.1012	-0.441
0.1044	-0.46
0.1083	-0.067
0.11	0.118
0.1195	0.07
0.1267	-0.24
0.1328	-0.459
0.1332	-0.507
0.1336	-0.112
0.1348	-0.406
0.1371	-0.206
0.1378	0.007
0.1425	-0.435
0.1465	-0.449
0.1475	0
0.1482	-0.616
0.15	0.047
0.1514	0.242
0.1536	-0.03
0.1562	-0.004
0.1571	0.48
0.1627	-0.369
0.1651	-0.581
0.1671	-0.349
0.1672	0.25
0.1677	-0.086
0.17	-0.584
0.1715	0.311
0.1721	-0.675
0.1722	-0.245
0.1734	0.343
0.174	-0.105
0.1745	-0.04
0.1751	-0.656
0.1775	0.001
0.1786	0.436
0.1802	0
0.1869	-0.078
0.1921	-0.226
0.1924	0.034
0.1957	0.007
0.1966	0.035
0.1968	-0.04
0.1972	-0.082
0.1999	-0.014
0.2005	0.618
0.2006	-0.337
0.2015	-0.12
0.2017	-0.024
0.205	-0.323
0.2052	0.496
0.2077	-0.095
0.2077	-0.56
0.2105	0.001
0.2125	-0.463
0.213	-0.361
0.2142	-0.721
0.2172	-0.158
0.2203	-0.833
0.2208	-0.135
0.2208	-0.196
0.2218	-0.005
0.2229	-0.076
0.2264	0.027
0.2283	-0.522
0.2315	-0.695
0.2317	-0.103
0.2372	-0.086
0.24	-0.305
0.2401	-0.375
0.2413	-0.293
0.2424	-0.128
0.2445	-0.29
0.2477	0
0.2518	-0.291
0.2536	-0.443
0.254	-0.506
0.2603	-0.041
0.2667	-0.471
0.2693	0.027
0.2715	-0.38
0.2747	-0.54
0.2749	-0.327
0.2778	0.193
0.2783	0.012
0.279	-0.284
0.2807	-0.497
0.2812	0.507
0.2826	-0.212
0.2839	-0.062
0.2882	-0.112
0.2995	-0.075
0.3	-0.297
0.3061	-0.352
0.312	-0.03
0.3138	-0.337
0.3157	-0.005
0.3194	-0.012
0.3211	0
0.3221	0.282
0.3231	-0.397
0.3236	0.945
0.3246	-0.023
0.3274	0.468
0.3305	-0.191
0.335	-0.038
0.3351	0.107
0.3383	-0.26
0.3402	0.044
0.3414	0.049
0.3442	-0.268
0.347	0
0.3471	-0.248
0.3481	0
0.3516	-0.002
0.3528	-0.008
0.353	0.048
0.3563	-0.249
0.3573	-0.059
0.3595	-0.363
0.3602	-0.359
0.364	0.03
0.3642	-0.154
0.3698	-0.243
0.37	-0.016
0.3737	0.273
0.3764	-0.406
0.3767	-0.318
0.3785	-0.515
0.3919	-0.012
0.3922	-0.003
0.3925	0.038
0.3926	-0.537
0.3967	0
0.3969	0.062
0.3969	-0.334
0.3978	-0.021
0.3983	-0.611
0.399	-0.366
0.4007	0.009
0.4018	-0.456
0.4025	-0.006
0.4054	-0.095
0.4083	0.045
0.4095	0.211
0.4099	-0.423
0.4131	-0.007
0.4136	-0.347
0.4145	0.019
0.4151	0.047
0.4153	-0.339
0.4157	0.023
0.4159	-0.198
0.422	-0.003
0.4264	-0.581
0.4268	-0.744
0.4274	0.022
0.4314	0.127
0.4326	-0.335
0.4339	0
0.4379	-0.005
0.4379	-0.444
0.4391	0.019
0.4391	-0.153
0.4436	0.118
0.447	-0.4
0.4487	0.032
0.4505	-0.556
0.451	0.024
0.4515	0.216
0.4519	-0.626
0.4577	-0.664
0.4625	0.036
0.4638	0.017
0.4684	-0.396
0.4697	-0.397
0.4697	-0.494
0.4699	-0.275
0.4716	-0.437
0.4717	0.024
0.4719	-0.523
0.4733	0.146
0.4742	-0.124
0.4759	-0.294
0.476	0.003
0.4762	-0.269
0.4775	-0.683
0.4785	-0.393
0.4842	-0.276
0.4845	0.06
0.4886	0
0.4945	0.146
0.4947	-0.002
0.5012	-0.084
0.5035	-0.521
0.5237	-0.001
0.527	-0.084
0.5304	0.033
0.5371	0.096
0.538	-0.217
0.539	-0.583
0.5406	0.041
0.5407	-0.64
0.5409	-0.018
0.541	-0.111
0.5416	-0.006
0.5429	-0.79
0.543	-0.273
0.5486	-0.213
0.5494	0.111
0.5504	-0.02
0.5523	-0.361
0.5524	-0.243
0.5568	-0.046
0.5571	0.347
0.5584	-0.266
0.5585	0
0.5597	0
0.5601	-0.621
0.5602	-0.186
0.5642	-0.015
0.5647	0
0.566	-0.004
0.5661	0.011
0.5666	-0.177
0.5668	-0.312
0.5703	0.334
0.571	0.139
0.5735	0.116
0.5741	0.45
0.5743	-0.35
0.5745	-0.527
0.5749	-0.05
0.5903	-0.148
0.5927	0.321
0.5957	-0.353
0.5961	0.354
0.5969	-0.007
0.6087	-0.091
0.6163	-0.013
0.6214	-0.644
0.6225	0.202
0.6227	-0.494
0.627	-0.004
0.6279	0.003
0.6389	0.017
0.6394	-0.295
0.6396	-0.452
0.6459	0.01
0.6463	-0.386
0.6474	-0.534
0.6529	-0.261
0.6533	-0.236
0.656	-0.044
0.656	-0.376
0.6566	-0.28
0.6576	-0.018
0.6584	-0.362
0.66	-0.148
0.6607	-0.253
0.6632	0.649
0.666	0.436
0.6711	-0.387
0.6727	-0.176
0.6807	0.016
0.6833	-0.632
0.689	-0.152
0.6892	-0.733
0.6939	-0.041
0.6982	-0.156
0.6997	-0.371
0.7	-0.266
0.7018	-0.173
0.7051	0.068
0.7068	0.392
0.7069	-0.285
0.708	-0.467
0.7102	-0.184
0.7108	-0.072
0.7123	-0.502
0.713	-0.23
0.7233	-0.263
0.7284	0.645
0.7323	0.012
0.7329	0.097
0.7331	0.009
0.7379	0.095
0.7394	0.1
0.74	-0.052
0.741	-0.004
0.7424	0.404
0.7434	-0.213
0.7446	0.112
0.7466	-0.212
0.7513	-0.485
0.7566	-0.493
0.7616	-0.252
0.769	-0.042
0.7747	-0.383
0.7754	-0.221
0.778	-0.074
0.7782	-0.532
0.7845	-0.038
0.7886	0.005
0.7917	0.003
0.8008	-0.173
0.8013	-0.104
0.8062	-0.26
0.8071	-0.149
0.8265	0.034
0.8285	0
0.8314	-0.241
0.8336	-0.117
0.8351	0
0.8385	0.005
0.8413	0.001
0.8449	-0.419
0.8498	-0.071
0.8547	0
0.8556	0.556
0.8557	-0.007
0.8576	0.182
0.8589	0.01
0.8592	-0.344
0.8628	-0.216
0.8643	-0.337
0.8659	-0.029
0.8693	-0.173
0.8726	0.442
0.8753	-0.004
0.8788	0.066
0.8837	-0.176
0.8841	0.327
0.8933	-0.055
0.9	-0.002
0.9001	0.267
0.9007	-0.311
0.9009	0.004
0.9072	-0.064
0.9088	-0.33
0.9203	0.06
0.9257	0.128
0.9277	-0.43
0.9325	0.001
0.9325	-0.613
0.9388	-0.004
0.9393	0.327
0.9495	-0.172
0.9501	0.037
0.9519	-0.261
0.9521	-0.001
0.9553	-0.328
0.956	0.092
0.9626	0.008
0.9685	-0.028
0.9702	-0.009
0.9741	-0.004
0.9769	0.403
0.9821	-0.372
0.9858	0.008
0.99	-0.021
0.9901	-0.002
1.017	-0.003
1.026	-0.268
1.031	0.002
1.035	-0.011
1.037	-0.394
1.046	0.138
1.047	-0.02
1.048	0.005
1.048	-0.194
1.056	-0.01
1.072	-0.075
1.076	0.013
1.089	-0.167
1.109	-0.333
1.128	0.027
1.132	2.032
1.132	0.056
1.135	0.334
1.141	-0.012
1.15	-0.215
1.153	-0.196
1.159	-0.08
1.171	-0.001
1.18	-0.381
1.189	0.038
1.19	-0.023
1.207	0.067
1.216	0.488
1.217	0.341
1.217	-0.001
1.217	-0.057
1.219	0.014
1.249	-0.403
1.258	-0.421
1.28	-0.012
1.281	0.01
1.287	-0.214
1.294	-0.006
1.299	0.291
1.3	0.056
1.306	0.024
1.308	0.385
1.313	-0.003
1.314	-0.116
1.315	-0.06
1.318	0.014
1.327	1.205
1.338	0.179
1.339	-0.24
1.369	-0.51
1.4	-0.568
1.426	0.042
1.453	0.351
1.457	0.016
1.464	0.011
1.47	-0.007
1.488	0.686
1.505	0.038
1.542	0
1.563	-0.084
1.57	-0.001
1.57	-0.002
1.617	0.027
1.62	0
1.639	0.984
1.708	-0.03
1.737	0.523
1.742	0.012
1.748	0.017
1.77	-0.001
1.774	-0.078
1.822	0.183
1.87	0.259
2.04	-0.035
2.069	0.036
2.097	0
2.253	0.001
2.372	0.001

## Sheet: Fig1D
Methylation: Log10 (Beta value)	Copy number variation (Gistic2)
-1.47496	-0.173
-1.39362	0.014
-1.3439	-0.082
-1.31158	-0.148
-1.29414	-0.567
-1.28904	0
-1.28067	-0.094
-1.27819	-0.334
-1.27491	-0.023
-1.26841	-0.213
-1.26201	0.111
-1.25571	-0.002
-1.25493	-0.249
-1.24872	0.022
-1.23508	-0.43
-1.22548	-0.121
-1.2233	-0.005
-1.2204	-0.06
-1.21896	0.004
-1.20831	0.095
-1.20621	-0.014
-1.19997	-0.58
-1.19791	-0.191
-1.19791	-0.273
-1.18642	-0.534
-1.18642	0
-1.18509	-0.596
-1.18442	-0.478
-1.1831	-0.154
-1.17522	0.351
-1.16813	0.031
-1.16558	0
-1.16558	-0.421
-1.16494	-0.329
-1.16368	-0.055
-1.16368	-0.032
-1.16178	-0.001
-1.16178	-0.829
-1.15989	-0.576
-1.15927	-0.583
-1.15304	-0.867
-1.14813	0.016
-1.14813	-0.211
-1.14813	-0.399
-1.14691	-0.198
-1.14509	-0.675
-1.13966	0.092
-1.13906	-0.94
-1.13847	1.205
-1.13847	-0.526
-1.13787	-0.215
-1.1343	0.109
-1.13194	-0.833
-1.1296	-0.383
-1.12726	-0.252
-1.12552	-0.226
-1.12494	0.1
-1.12205	-0.016
-1.12033	-0.084
-1.11976	0.012
-1.11976	-0.412
-1.11805	-0.564
-1.11748	-0.721
-1.11634	-0.002
-1.1152	-0.204
-1.11238	-0.075
-1.10846	-0.079
-1.10846	-0.621
-1.10791	-0.206
-1.10624	0.496
-1.10568	-0.275
-1.10403	0.012
-1.10403	-0.259
-1.10237	-0.062
-1.10182	-0.001
-1.09963	-0.851
-1.09854	-0.56
-1.09854	0.007
-1.09583	-0.922
-1.09528	-0.177
-1.09366	-0.528
-1.09259	-0.038
-1.09205	-0.246
-1.08778	-0.078
-1.08778	-0.105
-1.08778	-0.013
-1.08672	-0.149
-1.08619	-0.373
-1.0846	-0.673
-1.08355	-0.589
-1.08302	-0.483
-1.08197	-0.253
-1.08092	-0.483
-1.0804	-0.294
-1.07935	-0.216
-1.07779	0.045
-1.07676	-0.305
-1.0752	-0.441
-1.07417	-0.408
-1.07366	-0.594
-1.07314	0.183
-1.07314	0.005
-1.07314	-0.643
-1.07314	-0.9
-1.0716	-0.095
-1.06956	-0.354
-1.06854	-0.361
-1.06753	-0.479
-1.06298	0.01
-1.06298	0.021
-1.06248	-0.385
-1.06198	0.112
-1.06198	0.422
-1.06198	-0.56
-1.05948	-0.497
-1.05849	-0.616
-1.0575	-0.337
-1.057	-0.006
-1.057	-0.27
-1.05651	-0.337
-1.05651	-0.348
-1.05651	-0.35
-1.05601	0.044
-1.05552	-0.359
-1.05306	-0.24
-1.05306	0.004
-1.05257	-0.214
-1.05208	0.001
-1.05208	-0.28
-1.05159	-0.01
-1.05061	0.267
-1.04915	-0.216
-1.04915	-0.261
-1.04818	-0.196
-1.04721	-0.746
-1.04672	-0.29
-1.04672	-0.267
-1.04576	0.436
-1.04576	-0.645
-1.04528	-0.204
-1.04528	0.821
-1.04431	-0.327
-1.04431	0.003
-1.04431	-0.419
-1.04239	-0.059
-1.04239	-0.315
-1.04144	0.436
-1.04096	-0.176
-1.03953	-0.471
-1.03953	-0.421
-1.03905	-0.381
-1.03858	0
-1.03763	0.404
-1.03763	-0.202
-1.03716	-0.452
-1.0348	-0.03
-1.0348	-0.853
-1.0348	0.057
-1.03433	-0.084
-1.03433	-0.369
-1.03339	0.003
-1.03292	-0.953
-1.03245	-0.449
-1.03198	0.01
-1.03152	-0.167
-1.03058	-0.044
-1.03058	-0.015
-1.02965	-0.644
-1.02919	0
-1.02872	0.177
-1.02826	-0.002
-1.02826	-0.527
-1.02733	-0.596
-1.02687	0.012
-1.02641	-0.414
-1.02595	-1.014
-1.02595	-0.737
-1.02549	-0.328
-1.02503	-0.34
-1.02457	0.022
-1.02457	-0.336
-1.02319	0
-1.02273	-0.495
-1.02228	-0.003
-1.02228	-0.449
-1.02136	-0.53
-1.02091	0
-1.02045	-0.001
-1.02045	0.327
-1.02045	0.005
-1.01863	-0.071
-1.01818	-0.074
-1.01818	0.168
-1.01457	-0.212
-1.01457	-0.012
-1.01457	-0.337
-1.01368	-0.26
-1.01368	-0.018
-1.01368	-0.527
-1.01368	-0.506
-1.01323	0.945
-1.01189	0.45
-1.01189	-0.403
-1.01189	-0.495
-1.01144	-0.572
-1.011	-0.798
-1.01011	-0.165
-1.00966	0.013
-1.00966	0.011
-1.00966	-0.269
-1.00966	-0.293
-1.00966	0.041
-1.00877	-0.35
-1.00877	-0.153
-1.00877	0.618
-1.00833	-0.052
-1.00789	-0.344
-1.00789	0.094
-1.007	0
-1.007	0
-1.007	-0.441
-1.00656	-0.118
-1.00612	-0.632
-1.00568	-0.537
-1.00524	-0.001
-1.0048	-0.195
-1.0048	-1.273
-1.0048	-0.047
-1.00436	-0.269
-1.00349	-0.052
-1.00349	-0.004
-1.00305	-0.24
-1.00261	0.422
-1.00218	-0.751
-1.00218	-0.292
-1.00174	0.01
-1.00174	-0.351
-1.00174	-0.702
-1.00174	-0.834
-1.0013	-0.007
-1.0013	-0.311
-1.0013	0.023
-1.0013	-0.659
-1.0013	-0.346
-1.00087	0
-1.00087	-0.007
-1.00087	-0.023
-0.99957	-0.012
-0.99957	-1.172
-0.9987	0.984
-0.9987	-0.08
-0.9987	0.556
-0.99827	-0.021
-0.99783	-0.389
-0.99783	-0.558
-0.9974	-0.393
-0.9974	0
-0.9974	-0.41
-0.99697	-0.041
-0.99697	-0.31
-0.99697	0.012
-0.99697	-0.733
-0.99568	0.002
-0.99568	0
-0.99482	-0.337
-0.99439	-0.104
-0.99439	-0.443
-0.99396	-0.461
-0.99353	-0.403
-0.99311	-0.708
-0.99311	-0.383
-0.99268	-0.236
-0.99268	-0.352
-0.99268	-0.803
-0.9914	0.347
-0.9914	0.394
-0.99097	-0.276
-0.99097	-0.112
-0.99097	-0.504
-0.99055	-0.064
-0.99055	0.027
-0.99055	-0.037
-0.9897	-0.072
-0.9897	-0.076
-0.98928	0.06
-0.98928	-0.387
-0.98928	-0.654
-0.98928	-0.312
-0.98843	0.003
-0.98843	0.127
-0.98801	-0.493
-0.98801	0
-0.98758	0.507
-0.98716	-0.557
-0.98674	0.179
-0.98674	-0.243
-0.98674	0.141
-0.98632	-0.975
-0.9859	-0.465
-0.98464	0.146
-0.98464	-0.923
-0.9838	-0.241
-0.98338	0
-0.98213	2.032
-0.9813	-0.523
-0.9813	-0.268
-0.9813	0.068
-0.98088	-0.067
-0.98088	-0.478
-0.98047	0.033
-0.98047	-0.234
-0.98005	-0.854
-0.98005	-0.959
-0.97964	-0.525
-0.97964	-0.709
-0.97964	-0.909
-0.97922	-0.733
-0.97922	0.343
-0.97922	-0.031
-0.97922	-0.778
-0.97881	-0.006
-0.97881	0.115
-0.97881	0.252
-0.9784	-0.002
-0.97757	-0.334
-0.97716	-0.533
-0.97675	-0.221
-0.97469	0.001
-0.97469	0.255
-0.97428	-0.007
-0.97428	-0.406
-0.97428	-0.051
-0.97347	-0.554
-0.97347	0.211
-0.97306	-0.086
-0.97224	-0.028
-0.97184	-0.343
-0.97143	0.291
-0.97143	0.026
-0.97102	-0.02
-0.97062	0.056
-0.97062	-0.717
-0.96981	-0.532
-0.9694	0.042
-0.96859	-0.046
-0.96778	0.442
-0.96778	-0.062
-0.96617	-0.237
-0.96577	0
-0.96537	-0.537
-0.96417	0.405
-0.96337	-0.318
-0.96257	-0.124
-0.96257	0.206
-0.96257	-0.001
-0.96218	-0.196
-0.96059	-0.59
-0.96059	-0.33
-0.95979	-0.333
-0.9594	-0.374
-0.95861	-0.345
-0.95821	-0.297
-0.95782	-0.03
-0.95782	0.274
-0.95703	-0.506
-0.95703	-0.23
-0.95664	-0.059
-0.95624	0.022
-0.95546	0.037
-0.95507	-0.138
-0.95429	0.107
-0.95429	-0.419
-0.9539	-0.646
-0.9535	-0.598
-0.95273	-0.273
-0.95273	-0.075
-0.95234	0.056
-0.95234	0
-0.95234	0.331
-0.95156	-0.004
-0.95078	0.006
-0.95078	-0.316
-0.95039	-0.194
-0.95039	-0.03
-0.95001	-0.312
-0.94923	0.027
-0.94885	-0.02
-0.94885	-0.018
-0.94846	-0.139
-0.94846	0.003
-0.94808	-0.004
-0.94769	0
-0.94731	0
-0.94731	0.034
-0.94731	-0.632
-0.94731	-0.613
-0.94692	-0.428
-0.94615	-0.485
-0.94577	-0.007
-0.94539	0
-0.94348	-0.366
-0.94348	-0.117
-0.94348	-0.514
-0.94271	0.128
-0.94271	0.048
-0.94271	-0.522
-0.94233	-0.069
-0.94233	-0.049
-0.94195	-0.029
-0.94195	-0.462
-0.94157	-0.086
-0.94157	-0.715
-0.94119	-0.576
-0.94119	-0.367
-0.94044	-0.515
-0.93892	-0.005
-0.93855	0.645
-0.93817	-0.54
-0.93742	-0.744
-0.93742	-0.738
-0.93704	-0.038
-0.93704	-0.59
-0.93667	-0.343
-0.93592	-0.9
-0.93517	0.027
-0.93517	-0.003
-0.93517	-0.354
-0.93479	-0.33
-0.9333	-0.328
-0.93293	0.131
-0.93256	-0.369
-0.93107	0.191
-0.9307	-0.494
-0.9307	-0.761
-0.9307	-0.482
-0.92996	0.006
-0.92922	-0.004
-0.92885	-0.186
-0.92849	-0.266
-0.92812	-0.266
-0.92738	-0.23
-0.92702	0.005
-0.92702	-0.145
-0.92665	-0.295
-0.92628	0.138
-0.92628	-0.268
-0.92628	0.392
-0.92628	-0.709
-0.92592	-0.025
-0.92555	0.054
-0.92482	-1.293
-0.92336	0.014
-0.923	0.024
-0.92191	-0.64
-0.92118	-0.632
-0.9201	-0.011
-0.91973	0.149
-0.91937	-0.2
-0.91829	-0.091
-0.91757	-0.594
-0.91721	-0.397
-0.91686	-0.006
-0.91614	-0.04
-0.91471	-0.157
-0.914	-0.117
-0.91364	0.523
-0.91293	-0.571
-0.91257	-0.087
-0.91116	-0.057
-0.91116	-0.362
-0.91116	-0.561
-0.91045	-0.021
-0.91009	0.298
-0.90939	-0.586
-0.90833	-0.112
-0.90798	0.18
-0.90728	-0.435
-0.90658	0.096
-0.90658	0.307
-0.90588	0.017
-0.90588	-0.538
-0.90483	-0.682
-0.90448	-0.084
-0.90448	0.004
-0.90413	-0.103
-0.90413	-0.001
-0.90413	-0.641
-0.90309	-0.023
-0.90205	0.025
-0.9017	-0.213
-0.9017	-0.376
-0.9017	0.404
-0.90136	-0.148
-0.90136	-0.451
-0.90032	-0.172
-0.89928	0.019
-0.89928	-0.39
-0.89688	-0.012
-0.89688	-0.272
-0.89585	-0.261
-0.89585	0.047
-0.89551	-0.467
-0.89483	0.041
-0.89415	-0.774
-0.89347	-0.042
-0.89313	0.686
-0.89245	-0.476
-0.89008	0.211
-0.88975	-0.418
-0.88941	-0.001
-0.88907	-0.394
-0.88907	-0.024
-0.88907	-0.326
-0.8884	0.146
-0.8884	0.25
-0.88807	-0.353
-0.88739	0.488
-0.88739	-0.521
-0.88639	0.327
-0.88506	0.067
-0.88472	-0.795
-0.88273	0.396
-0.88074	-0.135
-0.87976	-0.494
-0.87877	0.03
-0.87844	-0.551
-0.87778	-0.263
-0.87778	-0.491
-0.87713	0.11
-0.8755	0.026
-0.87517	0.002
-0.87484	-0.288
-0.87419	-0.198
-0.87257	-0.001
-0.87257	-0.077
-0.87128	-0.331
-0.87063	-0.691
-0.87031	-1.05
-0.87031	-0.356
-0.87031	-0.959
-0.86934	-0.196
-0.8687	-0.234
-0.86774	-0.463
-0.8671	-0.504
-0.86391	0.216
-0.86296	0.265
-0.86296	-0.355
-0.86075	-0.041
-0.86012	-0.176
-0.85981	0.116
-0.85792	-0.285
-0.85792	-0.04
-0.85325	-0.02
-0.85263	-0.492
-0.85201	-0.193
-0.8514	0.011
-0.85109	0.097
-0.85047	-0.819
-0.84802	-0.337
-0.84802	0.017
-0.8471	-0.667
-0.8471	-0.046
-0.8468	-0.793
-0.84619	-0.281
-0.84224	-0.444
-0.84224	-0.379
-0.83983	-0.074
-0.83773	-0.318
-0.83565	-0.034
-0.83565	0.001
-0.83327	-0.371
-0.8318	0
-0.83003	-0.12
-0.82507	0.203
-0.82333	-0.112
-0.82304	-0.367
-0.82275	-0.482
-0.82016	-0.217
-0.81759	-0.356
-0.81702	-0.925
-0.81616	-0.196
-0.81588	0.035
-0.81474	0.008
-0.81446	-0.316
-0.81417	-0.226
-0.81389	-0.864
-0.81361	-0.371
-0.8122	-0.076
-0.80939	-0.009
-0.80827	0.009
-0.80771	-0.48
-0.80743	-0.406
-0.80576	-0.284
-0.80521	-0.184
-0.80521	-0.439
-0.80327	-0.607
-0.80189	-0.485
-0.80189	-0.502
-0.79997	-0.464
-0.79724	-0.613
-0.7967	-0.611
-0.79615	0.017
-0.79317	-0.568
-0.79183	-0.268
-0.79075	-0.152
-0.79022	-0.569
-0.78995	-0.748
-0.78835	-0.599
-0.78781	-0.665
-0.78516	-0.67
-0.78042	-0.522
-0.77911	0.01
-0.77392	-0.387
-0.77314	-0.483
-0.77288	0.024
-0.77057	-0.266
-0.76981	-0.198
-0.76981	-0.193
-0.76574	0.032
-0.76574	-0.349
-0.76472	-0.036
-0.76321	0.068
-0.76321	-0.621
-0.76195	0.282
-0.7612	-0.415
-0.76045	-0.839
-0.7597	-0.05
-0.7592	-0.343
-0.75746	-0.442
-0.75721	-0.236
-0.75671	-0.396
-0.75647	-0.471
-0.75473	0.314
-0.75326	-0.409
-0.75154	-0.107
-0.75105	0
-0.74812	-0.156
-0.74739	0.043
-0.7469	-0.456
-0.74618	-0.145
-0.74376	0.007
-0.74376	-0.355
-0.74328	-0.159
-0.74136	-0.564
-0.74065	-0.386
-0.74041	-0.474
-0.73945	-0.594
-0.73874	-0.025
-0.73802	-0.552
-0.73636	-0.155
-0.73542	-0.34
-0.734	0.403
-0.73236	-0.01
-0.73212	0.036
-0.73049	0.062
-0.72723	-0.665
-0.727	-0.532
-0.72677	-0.248
-0.7263	-0.668
-0.72285	-0.331
-0.71942	-0.026
-0.71829	-0.77
-0.7176	-0.316
-0.7176	-0.31
-0.71625	-0.612
-0.70465	-0.501
-0.70443	-0.651
-0.70246	-0.398
-0.70049	-0.51
-0.69508	-0.424
-0.694	-0.658
-0.69272	-0.19
-0.69037	0.068
-0.68677	0.346
-0.68613	0.885
-0.68571	0.436
-0.68298	-0.238
-0.68277	-0.504
-0.67819	-0.384
-0.67182	-0.452
-0.66797	-0.656
-0.66716	0.568
-0.66675	0.288
-0.66514	-0.491
-0.66294	-0.417
-0.66194	-0.678
-0.65876	-0.345
-0.65699	0.321
-0.65639	-0.4
-0.656	-0.629
-0.65443	-0.383
-0.65365	-0.536
-0.65267	-0.544
-0.63432	0.024
-0.63209	-0.162
-0.63041	-0.319
-0.62986	-0.176
-0.62507	0.038
-0.62489	-0.253
-0.6247	-0.611
-0.62415	0
-0.62397	-0.563
-0.61852	-0.015
-0.61208	-0.237
-0.61048	-0.328
-0.60924	-0.969
-0.60765	-0.403
-0.60713	0.182
-0.60485	-0.023
-0.60415	0.024
-0.60293	0.354
-0.59843	-0.428
-0.59739	0.45
-0.59739	-0.26
-0.59654	-0.569
-0.59278	-0.001
-0.58821	0.015
-0.58771	-0.574
-0.58653	-0.397
-0.58637	-0.744
-0.58637	-0.342
-0.5862	-0.573
-0.58553	0.06
-0.58553	-0.703
-0.57938	-0.504
-0.57873	0.07
-0.57414	-0.524
-0.57365	-0.031
-0.56992	0.539
-0.56431	-0.39
-0.56368	-0.757
-0.56146	-0.335
-0.55988	-0.503
-0.55799	-0.395
-0.55517	0.209
-0.553	-0.013
-0.553	-0.52
-0.55269	0.011
-0.55129	-0.361
-0.5496	-0.715
-0.54898	-0.436
-0.54622	0.229
-0.54546	0.334
-0.545	-0.799
-0.54348	-0.696
-0.53835	-0.507
-0.53566	-0.454
-0.53195	-0.276
-0.53003	-0.528
-0.52988	0.036
-0.52974	-0.044
-0.529	-0.87
-0.52739	0.007
-0.51499	-0.323
-0.51046	-0.366
-0.50738	0.018
-0.50529	-0.537
-0.50031	0.044
-0.49894	-0.02
-0.4973	-0.086
-0.49526	-0.899
-0.48652	-0.646
-0.48625	-0.505
-0.47782	-0.527
-0.47237	-0.888
-0.47198	-0.699
-0.47083	-0.628
-0.46737	0.393
-0.46712	-0.058
-0.46623	0.246
-0.46458	-0.239
-0.4583	-0.728
-0.45506	-0.037
-0.45002	-0.578
-0.44709	-0.336
-0.4443	-0.436
-0.43593	0.002
-0.43498	-0.762
-0.43392	-0.531
-0.43321	-0.307
-0.43321	0.039
-0.42829	0.175
-0.42724	-0.289
-0.424	-0.66
-0.42148	-0.015
-0.42125	0.311
-0.4209	-0.412
-0.41612	0.048
-0.4133	-0.795
-0.40638	0.118
-0.40572	-0.591
-0.39816	-0.279
-0.39621	-0.382
-0.38955	0.217
-0.37623	0.001
-0.37458	0.047
-0.37335	0.23
-0.3709	0.139
-0.37069	-0.691
-0.36845	-0.824
-0.36421	-0.75
-0.36341	0.323
-0.36081	-0.191
-0.35922	0.016
-0.35863	-0.088
-0.33311	-0.532
-0.33152	-0.266
-0.32975	-0.001
-0.29397	-0.544
-0.28853	-0.03
-0.28266	-0.433
-0.27968	-0.899
-0.27157	0.005
-0.27019	-0.231
-0.26217	-0.313
-0.14942	-0.457

## Sheet: Fig1E
	Ratio (%)
	WT	LOH
D8S1786	0.666667	0.333333
D8S1752	0.857143	0.142857

## Sheet: Fig1F
	PDLIM2 gene
	mRNA	Copy number
NL-20	1	2
CALU-6	0.01	1.02116
H727	0.02	1.59004
H460	0.001	1.34147
H2122	0.042	2.03817
H23	0.128	0.37644
H358	7.26	1.24404
SKLU-1	0.39	1.68519
SW1573	0.01	0.84179
CALU-1	1.95	1.29304
128-88T	0.049	1.76728
H1299	0.003	0.242727
273T	0.815	2.17198
H827	1.017	1.23739
H1650	2.168	0.679245
H3255	5.118	0.587462
343T	1.365	0.918512
CALU-3	0.377	1.28991
H1435	1.198	0.915107
H1793	6.833	1.6372
H596	0.195	0.781737
H838	0.08	1.73967
H1838	2.36	1.60291
A549	0.01	5.2647
H1975	1.086	2.50668

## Sheet: Fig1G
	Found tumor
Age (Month)	WT (60)	HT (95)	KO (74)
1.87	0
1.87	0
2.04	0
2.04	0
2.17	0
2.17	0
2.3	0
2.3	0
2.99	0
3.22	0
4.5	0
7.76	0
7.76	0
11.7	0
11.84	0
12.13	0
12.16	0
12.16	0
12.3	0
12.33	0
12.33	0
12.49	0
12.92	0
16.37	1
16.54	0
17.82	0
18.41	0
18.58	0
18.61	0
18.61	0
1.81	0
1.81	0
1.87	0
1.87	0
2.04	0
2.1	0
2.24	0
2.24	0
2.3	0
2.53	0
2.79	0
3.39	0
6.25	0
6.25	0
6.54	0
6.61	0
7.53	0
7.63	0
7.69	0
7.76	0
7.86	0
8.42	0
9.01	0
9.8	0
9.9	0
10.26	0
12.1	0
12.13	0
12.33	0
12.33	0
1.84		0
2.07		0
2.17		0
2.17		0
2.63		0
2.83		0
2.83		0
2.93		0
2.93		0
2.99		0
3.19		0
3.39		0
3.39		0
3.45		0
3.48		0
4.6		0
5.52		0
5.92		0
6.12		0
6.25		0
6.51		0
7.04		0
7.07		0
7.17		0
7.23		0
7.99		0
8.02		0
8.09		0
8.12		0
8.28		0
9.93		0
10.29		0
10.39		0
10.55		0
10.59		0
12.16		0
16.96		1
18.31		0
18.48		0
18.61		1
18.61		0
18.61		0
1.81		0
1.84		0
1.84		0
1.91		0
1.91		0
2.04		0
2.07		0
2.1		0
2.1		0
2.1		0
2.17		0
2.24		0
2.24		0
2.24		0
2.3		0
2.3		0
2.3		0
2.3		0
2.73		0
2.73		0
2.93		0
3.02		0
3.09		0
3.09		0
3.09		0
3.09		0
3.09		0
3.25		0
3.25		0
3.25		0
3.39		0
3.42		0
3.42		0
3.62		0
3.62		0
6.08		0
6.25		0
6.48		0
6.48		0
6.48		0
6.48		0
6.48		0
6.74		0
6.84		0
7.2		0
7.5		0
7.5		0
11.93		1
11.93		0
12.13		1
15.32		1
18.28		1
18.31		1
1.87			0
1.87			0
2.17			0
2.24			0
2.24			0
2.37			0
2.37			0
2.43			0
2.99			0
3.29			0
11.84			0
11.9			1
12			1
12.1			1
12.46			0
12.59			0
12.66			0
12.69			0
14.99			1
15.42			1
15.45			0
15.45			0
16.18			0
16.57			0
17.13			1
17.29			1
17.29			1
17.69			0
17.82			1
17.82			1
17.88			0
18.05			1
18.48			0
18.61			0
18.84			0
18.87			1
18.87			1
18.87			1
18.87			1
13.97			1
1.87			0
1.87			0
1.94			0
1.94			0
2.1			0
2.1			0
2.17			0
2.17			0
2.24			0
2.24			0
3.65			0
5.03			0
5.72			0
6.38			0
7.07			0
7.1			0
7.1			0
7.2			0
7.53			0
7.56			1
7.56			0
7.69			0
7.73			0
7.99			0
9.04			0
9.24			0
9.8			0
9.83			0
10.22			1
11.31			1
12.23			0
15.48			1
15.55			1
16.44			0
