# Supplementary material for: Improving PD-1 blockade plus chemotherapy for complete remission of lung cancer by nanoPDLIM2
Source: eLife journal article supplement (doi:10.7554/elife.89638), 2023-08-24

# Figure 1 --- Source Data 2 Related to Figure 1E

D8S1786-inverted

Lung cancer patient number:

2488 2656 2411 2427

NL T NL T NL T NL T

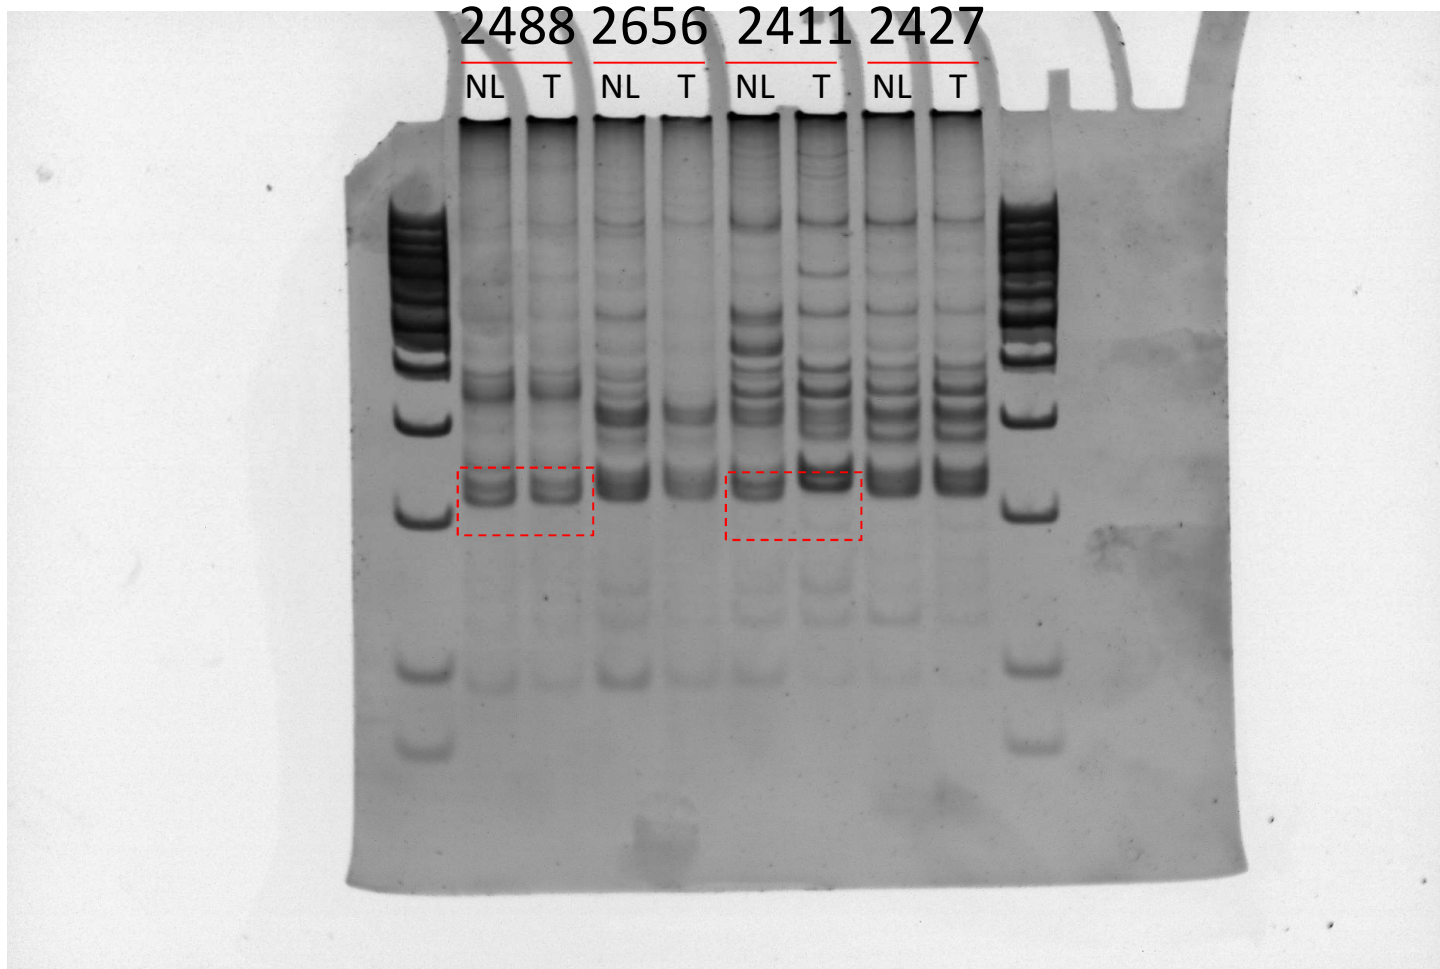

# Figure 1 --- Source Data 2 Related to Figure 1E

D8S1752-inverted

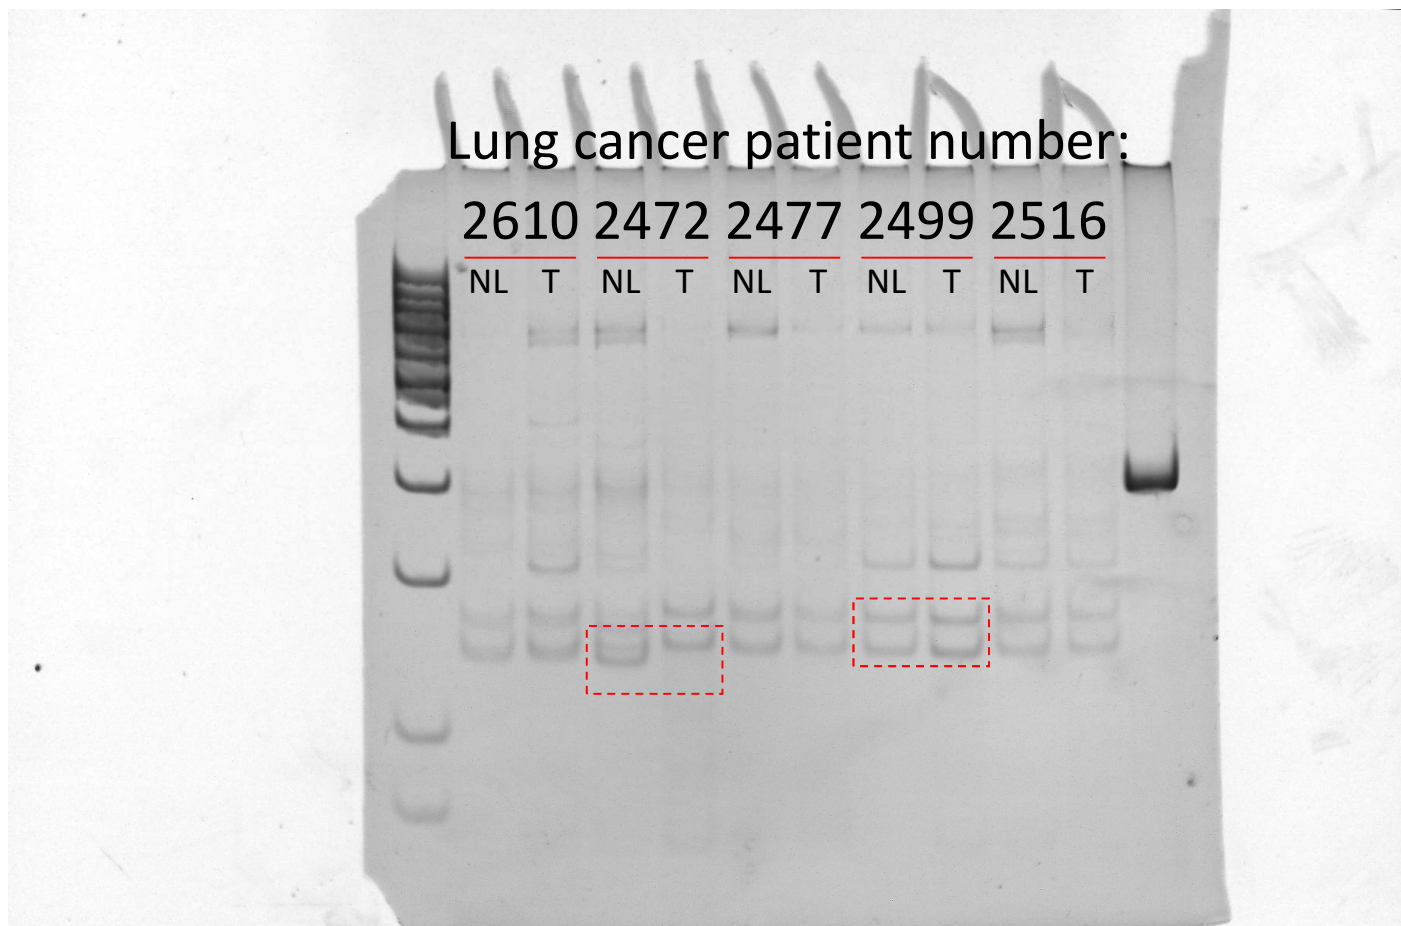

Supplement: fig1-data3 [file elife-89638-fig1-data3-v1.zip]
