# Supplementary material for: Improving PD-1 blockade plus chemotherapy for complete remission of lung cancer by nanoPDLIM2
Source: eLife journal article supplement (doi:10.7554/elife.89638), 2023-08-24
Supplement: fig2-data1 [file elife-89638-fig2-data1-v1.zip]

## Sheet: Fig2B
Tumor burden	Tumor burden	Tumor burden		Tumor number	Tumor number	Tumor number
Ctrl	Vec	PDLIM2		Ctrl	Vec	PDLIM2
1.8713	1.5839	0.9938		16	17	15
1.4462	1.4158	1.1551		17	15	19
1.6378	1.2456	0.8859		16	15	11
1.4546	2.1761	1.066		17	20	16
1.7457	1.8452	1.2629		14	18	19
1.4001	1.62	1.0388		14	19	16
1.9755				22
1.5331				17
2.274				23
1.8509				19
1.5085				20
1.7059				16

## Sheet: Fig2C
Nuclear STAT3+ cell (%)			Nuclear RelA+ cell (%)
Vec	PDLIM2		Vec	PDLIM2
20.8	8.8		13.6	4.8
19.2	6.4		16.8	5.6
26.4	7.2		15.2	4
28	8		18.4	3.2
24	8		12.8	5.6
18.4	9.6		16	4

## Sheet: Fig2D
Bcl-xL intensity			Cleaved Caspase 3+ (%)
Vec	PDLIM2		Vec	PDLIM2
45	13		2.4	4.8
58	27		1.6	6.4
51	23		3.2	7.2
62	25		1.6	5.6
44	19		3.2	8
23	20		1.6	6.4

## Sheet: Fig2E
Cyclin D1+ cell (%)			BrdU+ cell (%)
Vec	PDLIM2		Vec	PDLIM2
30.2	16.2		3	1.6
32.4	14.2		2.8	1.8
22	11		3.4	2.2
24.2	8		4.2	2
26.6	6.6		3.6	1.4
28	9.4		3.2	1.2
