# Supplementary material for: Improving PD-1 blockade plus chemotherapy for complete remission of lung cancer by nanoPDLIM2
Source: eLife journal article supplement (doi:10.7554/elife.89638), 2023-08-24
Supplement: fig3-data1 [file elife-89638-fig3-data1-v1.zip]

## Sheet: Fig3B
Copy per cell
Tumor		Liver		Kidney		Spleen
Vec	PDLIM2	Vec	PDLIM2	Vec	PDLIM2	Vec	PDLIM2
37.1908	30.8598	0.637427	0.720041	0.526689	0.359627	0.138563	0.145509
27.7338	27.8647	0.569785	0.703613	0.516879	0.433936	0.155965	0.141065
25.5874	23.8405	0.799607	0.731666	0.473885	0.461948	0.127536	0.0998243

## Sheet: Fig3D
	Body weight (%)
Week	Ctrl						Vec					PDLIM2
0	100	100	100	100	100	100	100	100	100	100	100	100	100	100	100	100
1	101	101	108	102	100	108	103	102	100	109	103	102	101	100	112	107
2	98	100	105	116	107	107	109	103	101	116	109	103	101	99	119	114
3	102	105	110	105	107	114	114	106	109	116	95	110	106	105	117	127
4	101	103	110	107	105	111	112	106	106	120	109	109	106	101	131	132
5	102	102	112	119	107	109	116	107	110	117	110	109	106	103	136	127
6	104	107	113	113	106	108	107	104	102	114	104	107	105	103	142	124
