# Supplementary material for: Improving PD-1 blockade plus chemotherapy for complete remission of lung cancer by nanoPDLIM2
Source: eLife journal article supplement (doi:10.7554/elife.89638), 2023-08-24

Figure 3-Source Data 3

Western blot image shown in Figure 3B with the relevant bands clearly labelled

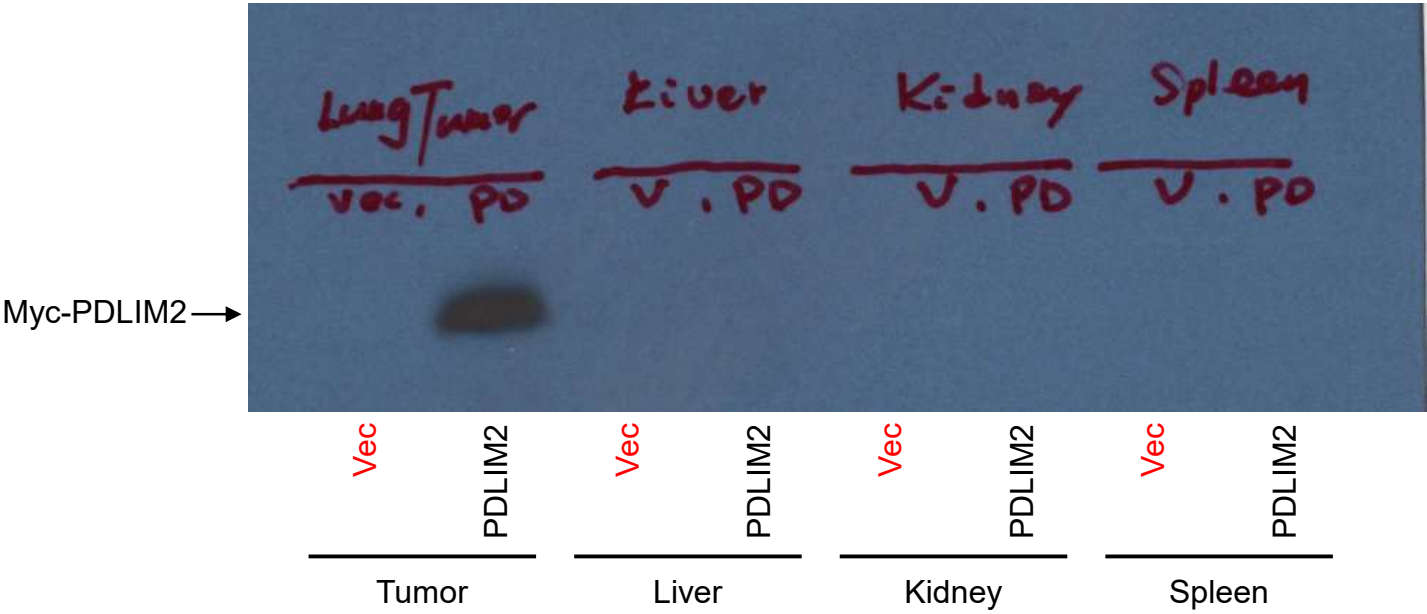

Figure 3-Source Data 3

Western blot image shown in Figure 3B with the relevant bands clearly labelled

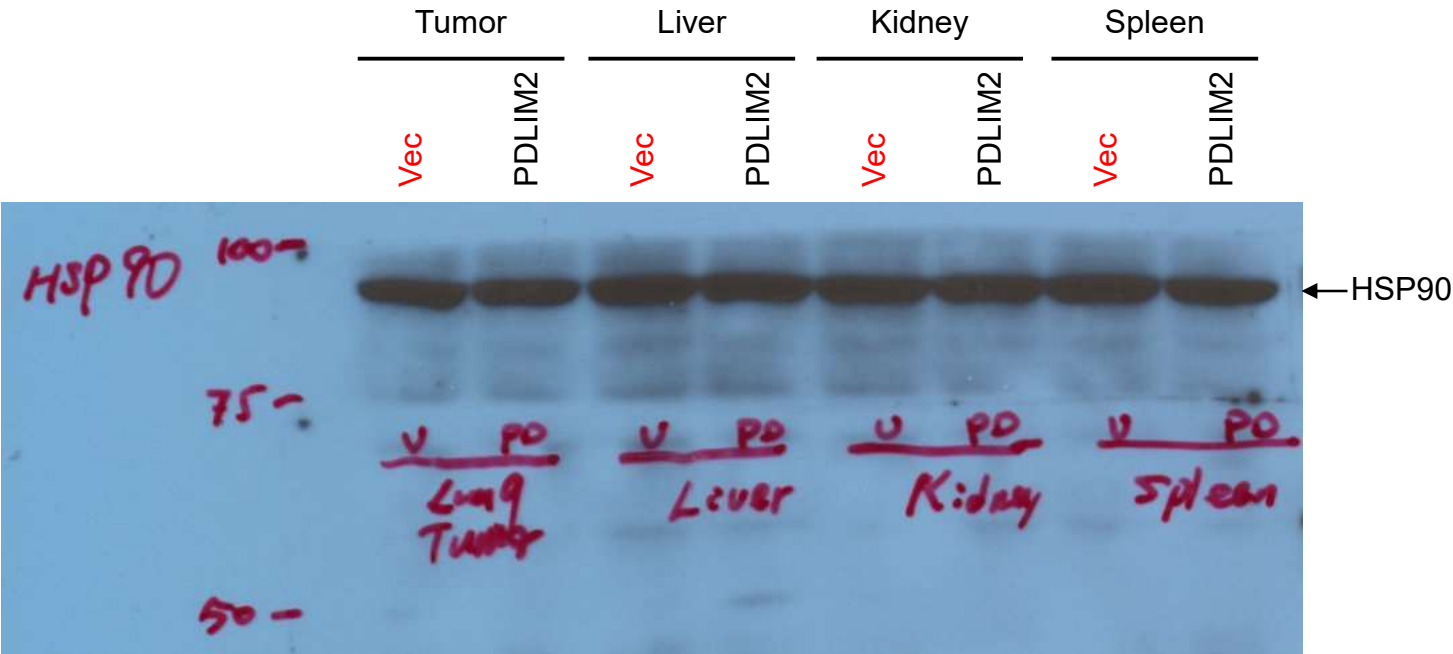

Supplement: fig3-data3 [file elife-89638-fig3-data3-v1.zip]
