# Supplementary material for: Improving PD-1 blockade plus chemotherapy for complete remission of lung cancer by nanoPDLIM2
Source: eLife journal article supplement (doi:10.7554/elife.89638), 2023-08-24
Supplement: fig4-data1 [file elife-89638-fig4-data1-v1.zip]

## Sheet: Fig4A
Tumor number	Tumor number	Tumor number	Tumor number		Tumor burden	Tumor burden	Tumor burden	Tumor burden
Vec	Vec	PDLIM2	PDLIM2		Vec	Vec	PDLIM2	PDLIM2
Ctrl	Chemo	Ctrl	Chemo		Ctrl	Chemo	Ctrl	Chemo
17	9	15	3		1.5839	0.2094	0.9938	0.1031
15	8	19	5		1.4158	0.1686	1.1551	0.0812
15	9	11	2		1.2456	0.2257	0.8859	0.066
20	8	16	3		2.1761	0.166	1.066	0.0801
18	9	19	4		1.8452	0.2215	1.2629	0.0817
19		16			1.62		1.0388

## Sheet: Fig4B
Cleaved Caspase 3+ (%)
Vec		PDLIM2
Ctrl	Chemo	Ctrl	Chemo
2.4	6.4	4.8	12.8
1.6	5.6	6.4	15.2
3.2	8	7.2	13.6
1.6	7.2	5.6	12.8
3.2	5.6	8	17.6
1.6	7.2	6.4	14.4

## Sheet: Fig4C
Nuclear RelA+ cell (%)
Vec		PDLIM2
Ctrl	Chemo	Ctrl	Chemo
13.6	30.4	4.8	6.4
16.8	26.4	5.6	7.2
15.2	23.2	4	5.6
18.4	32.8	3.2	6.4
12.8	28	5.6	8
16	24	4	4.8

## Sheet: Fig4D
MDR1 intensity
Vec		PDLIM2
Ctrl	Chemo	Ctrl	Chemo
0.121	49.376	2.86	10.057
0.918	98.536	0.205	28.218
0.084	131.497	0.249	15.771
6.2	117.002	1.482	21.114
2.63	153.542	4.819	16.437
2.341	88.366	1.617	14.529
