# Supplementary material for: Improving PD-1 blockade plus chemotherapy for complete remission of lung cancer by nanoPDLIM2
Source: eLife journal article supplement (doi:10.7554/elife.89638), 2023-08-24
Supplement: fig5-data1 [file elife-89638-fig5-data1-v1.zip]

## Sheet: Fig5A
CD4+ T cells per field			CD8+ T cells per field
Vec	PDLIM2		Vec	PDLIM2
0	6		0	4
2	8		1	4
0	7		0	3
2	5		0	2
1	4		1	3
0	4		0	3

## Sheet: Fig5B
MFI of MHC-I in EpCAM+ tumor cell
Vec	PDLIM2
32199.8	53753.2
33831.9	52829.3
34203.5	50712.2
33933.1	53859.6

## Sheet: Fig5C
Tumor burden	Tumor burden	Tumor burden	Tumor burden		Tumor number	Tumor number	Tumor number	Tumor number
Vec	Vec	PDLIM2	PDLIM2		Vec	Vec	PDLIM2	PDLIM2
Ctrl	αPD-1	Ctrl	αPD-1		Ctrl	αPD-1	Ctrl	αPD-1
1.5839	1.299	0.9938	0.5178		17	15	15	14
1.4158	1.1001	1.1551	0.4026		15	15	19	13
1.2456	1.0687	0.8859	0.5325		15	14	11	11
2.1761	1.099	1.066	0.5985		20	13	16	15
1.8452	1.2017	1.2629	0.698		18	15	19	12
1.62		1.0388			19		16

## Sheet: Fig5D
CD4+ T cells per field (αPD-1 treated)			CD8+ T cells per field (αPD-1 treated)
Vec	PDLIM2		Vec	PDLIM2
8	14		7	12
11	17		8	15
10	14		9	12
9	19		8	16
7	15		5	18
8	17		9	14

## Sheet: Fig5E
IFNγ+ in CD8+ T cell (%) (αPD-1 treated)			IFNγ+ in CD4+ T cell (%) (αPD-1 treated)
Vec	PDLIM2		Vec	PDLIM2
16.52	22.09		7.55	8.78
13.1	25.51		5.73	8.55
16.51	23.34		7.8	8.89

## Sheet: Fig5F
Cleaved Caspase 3+ (%)
Vec		PDLIM2
Ctrl	αPD-1	Ctrl	αPD-1
2.4	4	4.8	8.8
1.6	4.8	6.4	10.4
3.2	4.8	7.2	11.2
1.6	5.6	5.6	8
3.2	4	8	12.8
1.6	3.2	6.4	10.4
