# Supplementary material for: Improving PD-1 blockade plus chemotherapy for complete remission of lung cancer by nanoPDLIM2
Source: eLife journal article supplement (doi:10.7554/elife.89638), 2023-08-24
Supplement: fig6-data1 [file elife-89638-fig6-data1-v1.zip]

## Sheet: Fig6C
Relative tumor number	Relative tumor number	Relative tumor number	Relative tumor number		Relative tumor burden	Relative tumor burden	Relative tumor burden	Relative tumor burden
WT	WT	ΔSPC	ΔSPC		WT	WT	ΔSPC	ΔSPC
Ctrl	Chemo/αPD-1	Ctrl	Chemo/αPD-1		Ctrl	Chemo/PD1	Ctrl	Chemo/PD1
0.7742	0.1161	1.4323	0.5419		1.0551	0.0016	1.6798	0.2771
0.9677	0.0774	1.3161	0.6581		1.0324	0.0197	1.7234	0.3227
1.1613	0.1548	1.5097	0.8903		0.6174	0.0255	1.5862	0.7714
1.0839	0.1161	1.6645	0.929		1.1169	0.0392	1.9302	0.2076
0.929	0.2182	1.5871			1.1782	0.0614	1.9541
1.0839	0.2727	1.6258			1.175	0.0568
1.0213	0.1636				0.9081	0.0496
1.0851	0.2182				1.0284	0.0639
1.0213	0.1636				0.9133	0.0474
1.0851					1.0961
0.8936					0.8791
0.8936					1.0249
1.0645					0.7954
0.8226					1.1797
1.1129					1.0962
1.0364					0.8934
1.0909					1.0103
0.8727

## Sheet: Fig6D
MHC-I intensity
Ctrl	Chemo	αPD-1	Chemo/αPD-1
207.84	279.688	282.454	305.048
189.489	81.2111	214.892	210.649
100.727	114.066	154.879	111.071
294.187	247.935	173.659	276.039
91.0283	297.069	174.367	82.238
198.347	217.025	138.576	182.979

## Sheet: Fig6E
Tumor number	Tumor number	Tumor number	Tumor number	Tumor number	Tumor number	Tumor number	Tumor number		Tumor burden	Tumor burden	Tumor burden	Tumor burden	Tumor burden	Tumor burden	Tumor burden	Tumor burden
Vec	Vec	Vec	Vec	PDLIM2	PDLIM2	PDLIM2	PDLIM2		Vec	Vec	Vec	Vec	PDLIM2	PDLIM2	PDLIM2	PDLIM2
Ctrl	Chemo	αPD-1	Chemo/αPD-1	Ctrl	Chemo	αPD-1	Chemo/αPD-1		Ctrl	Chemo	αPD-1	Chemo/αPD-1	Ctrl	Chemo	αPD-1	Chemo/αPD-1
17	9	15	4	15	3	14	1		1.5839	0.2094	1.299	0.1136	0.9938	0.1031	0.5178	0.0042
15	8	15	4	19	5	13	0		1.4158	0.1686	1.1001	0.0817	1.1551	0.0812	0.4026	0
15	9	14	3	11	2	11	1		1.2456	0.2257	1.0687	0.0838	0.8859	0.066	0.5325	0.0005
20	8	13	5	16	3	15	0		2.1761	0.166	1.099	0.0984	1.066	0.0801	0.5985	0
18	9	15	3	19	4	12	0		1.8452	0.2215	1.2017	0.0702	1.2629	0.0817	0.698	0
19				16					1.62				1.0388

## Sheet: Fig6F
CD4+ T cells per field (Chemo/αPD-1 treated)			CD8+ T cells per field (Chemo/αPD-1 treated)
Vec	PDLIM2		Vec	PDLIM2
16	31		12	19
17	27		13	23
15	22		16	17
19	25		14	18
18	27		15	21
19	28		13	22

## Sheet: Fig6G
IFNγ+ in CD8+ T cell (%) (Chemo/αPD-1 treated)			IFNγ+ in CD4+ T cell (%) (Chemo/αPD-1 treated)
Vec	PDLIM2		Vec	PDLIM2
25.96	28.11		21.53	14.33
22.13	26.08		14.55	15.64
21.54	32.91		14.26	19.35
22.68	31.88		25.48	23.81
21.57	27.71		13.36	15.51

## Sheet: Fig6H
	Body weight (%)
Week	Ctrl					Vec					PDLIM2
0	100	100	100	100	100	100	100	100	100	100	100	100	100	100	100
1	99	100	99	102	101	100	104	101	101	102	109	106	132	106	106
2	102	106	106	105	103	118	115	114	110	112	119	115	128	117	111
3	101	107	103	103	100	107	110	106	108	112	116	107	128	109	103
4	106	107	109	113	108	114	116	119	112	111	124	114	136	115	114
5	106	110	111	114	110	116	119	110	116	115	125	115	139	116	111
6	109	107	108	108	105	106	118	112	109	117	125	111	130	118	110
