# Supplementary material for: Improving PD-1 blockade plus chemotherapy for complete remission of lung cancer by nanoPDLIM2
Source: eLife journal article supplement (doi:10.7554/elife.89638), 2023-08-24
Supplement: fig6-figsupp2-data1 [file elife-89638-fig6-figsupp2-data1-v1.zip]

## Sheet: Fig6S2A
Body weight change (g)
Ctrl	Epi	Epi + Chemo
8.8	1.3	-9.1
5.4	1.8	-5.2
5.4	4	-8.6
3.9	2.6	-9.6
2.1
4.8

## Sheet: Fig6S2B
	Peritoneal effusion (%)
Ctrl	100	0	0
Epi	100	0	0
Epi + Chemo	0	75	25
