# Supplementary material for: Improving PD-1 blockade plus chemotherapy for complete remission of lung cancer by nanoPDLIM2
Source: eLife journal article supplement (doi:10.7554/elife.89638), 2023-08-24
Supplement: fig6-figsupp3-data1 [file elife-89638-fig6-figsupp3-data1-v1.zip]

## Sheet: Fig6S3
Relative tumor number	Relative tumor number	Relative tumor number	Relative tumor number	Relative tumor number	Relative tumor number	Relative tumor number		Relative tumor burden	Relative tumor burden	Relative tumor burden	Relative tumor burden	Relative tumor burden	Relative tumor burden	Relative tumor burden
Ctrl	Epi-drug	Epi-drug	Epi-drug	PDLIM2	PDLIM2	PDLIM2		Ctrl	Epi-drug	Epi-drug	Epi-drug	PDLIM2	PDLIM2	PDLIM2
	Ctrl	Chemo	αPD-1	Ctrl	Chemo	αPD-1			Ctrl	Chemo	αPD-1	Ctrl	Chemo	αPD-1
0.7742	0.5419	0.0387	0.3097	0.9574	0.1915	0.6774		1.0551	0.5218	0.0012	0.0722	0.624	0.0648	0.2687
0.9677	0.6968	0.0387	0.4258	1.2128	0.3191	0.629		1.0324	0.6925	0.0042	0.0573	0.7253	0.051	0.2089
1.1613	0.6968	0	0.3484	0.7021	0.1277	0.5323		0.6174	0.3035	0	0.0556	0.5563	0.0414	0.2763
1.0839	0.6581	0	0.1935	0.7742	0.1636	0.8182		1.1169	0.5419	0	0.0658	0.5531	0.0474	0.3545
0.929				1.0364	0.2182	0.6545		1.1782				0.748	0.0484	0.4134
1.0839				0.8727				1.175				0.6153
1.0213								0.9081
1.0851								1.0284
1.0213								0.9133
1.0851								1.0961
0.8936								0.8791
0.8936								1.0249
1.0645								0.7954
0.8226								1.1797
1.1129								1.0962
1.0364								0.8934
1.0909								1.0103
0.8727
